# Supplementary material for: Transformation of Iodosulfuron-Methyl into Ionic Liquids Enables Elimination of Additional Surfactants in Commercial Formulations of Sulfonylureas
Source: MDPI journal article supplement (doi:10.3390/molecules26154396), 2021-07-21
Supplement: s1 [file s1]

## ELECTRONIC SUPPORTING INFORMATION

### **Transformation of iodosulfuron-methyl into ionic liquids enables elimination of additional surfactants in commercial formulations of sulfonyleureas**

Witold Stachowiak <sup>1</sup>, Radosław Szumski <sup>1</sup>, Jan Homa <sup>1</sup>, Marta Woźniak-Karczewska <sup>1</sup>, Anna Parus <sup>1</sup>, Beata Strzemiecka <sup>1</sup>, Lukasz Chrzanowski <sup>1,\*</sup> and Michał Niemczak <sup>1</sup>

<sup>1</sup> Department of Chemical Technology, Poznan University of Technology, Poznan 60-965, Poland; witold.stachowiak@doctorate.put.poznan.pl (W.S.); r.szumski@isofcik.eu (R.S.); jan.j.homa@doctorate.put.poznan.pl (J.H.); marta.wozniak-karczewska@put.poznan.pl (M.W.-K.); an-na.parus@put.poznan.pl (A.P.); beata.strzemiecka@put.poznan.pl (B.S.); michal.niemczak@put.poznan.pl (M.N.)

\* Correspondence: lukasz.chrzanowski@put.poznan.pl

**The following abbreviations were used in ultraviolet (UV) spectra:**

$\lambda_{max}$  = the wavelength of maximum absorbance

$\epsilon_{\lambda_{max}}$  = molar absorption coefficient at  $\lambda_{max}$

**The following abbreviations were used to explain the multiplicities in nuclear magnetic resonance (NMR) spectra:**

s = singlet, d = doublet, t = triplet, m = multiplet,

**Figure S1.** UV spectrum of cocotrimethylammonium ((5-iodo-2-(methoxycarbonyl)phenyl)sulfonyl)((4-methoxy-6-methyl-1,3,5-triazin-2-yl)carbamoyl)amidate (**1**).

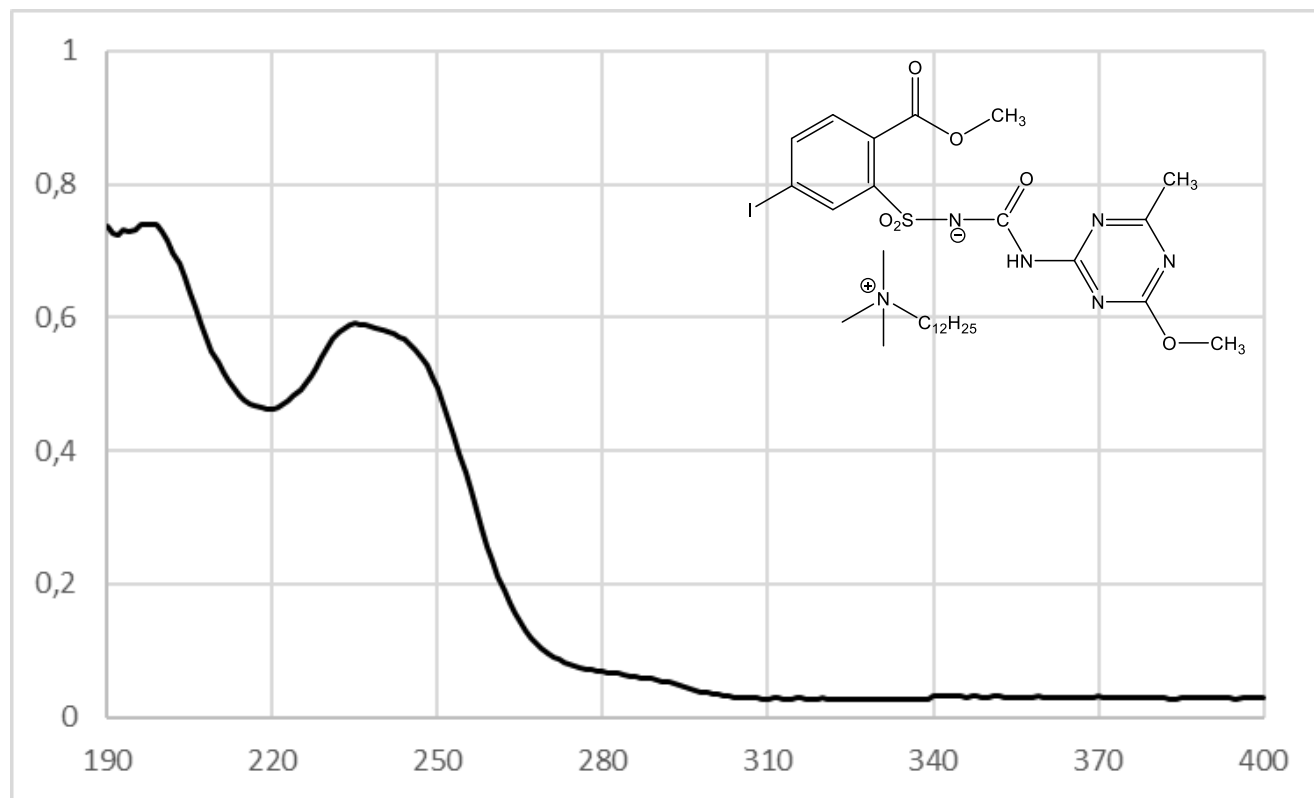

$$\lambda_{1\max}(\text{water}) = 197 \text{ nm}; \lambda_{2\max}(\text{water}) = 235 \text{ nm}$$

$$\varepsilon_{\lambda_{1\max}} = 2.93 \cdot 10^4 \text{ dm}^3 \text{ mol}^{-1} \text{ cm}^{-1}; \varepsilon_{\lambda_{2\max}} = 2.34 \cdot 10^4 \text{ dm}^3 \text{ mol}^{-1} \text{ cm}^{-1}$$

$$\varepsilon_{\lambda_{1\max}} / \varepsilon_{\lambda_{2\max}} = 1.25$$

**Figure S2.** FT-IR spectrum of cocotrimethylammonium ((5-iodo-2-(methoxycarbonyl)phenyl)sulfonyl)((4-methoxy-6-methyl-1,3,5-triazin-2-yl)carbamoyl)amidate (**1**).

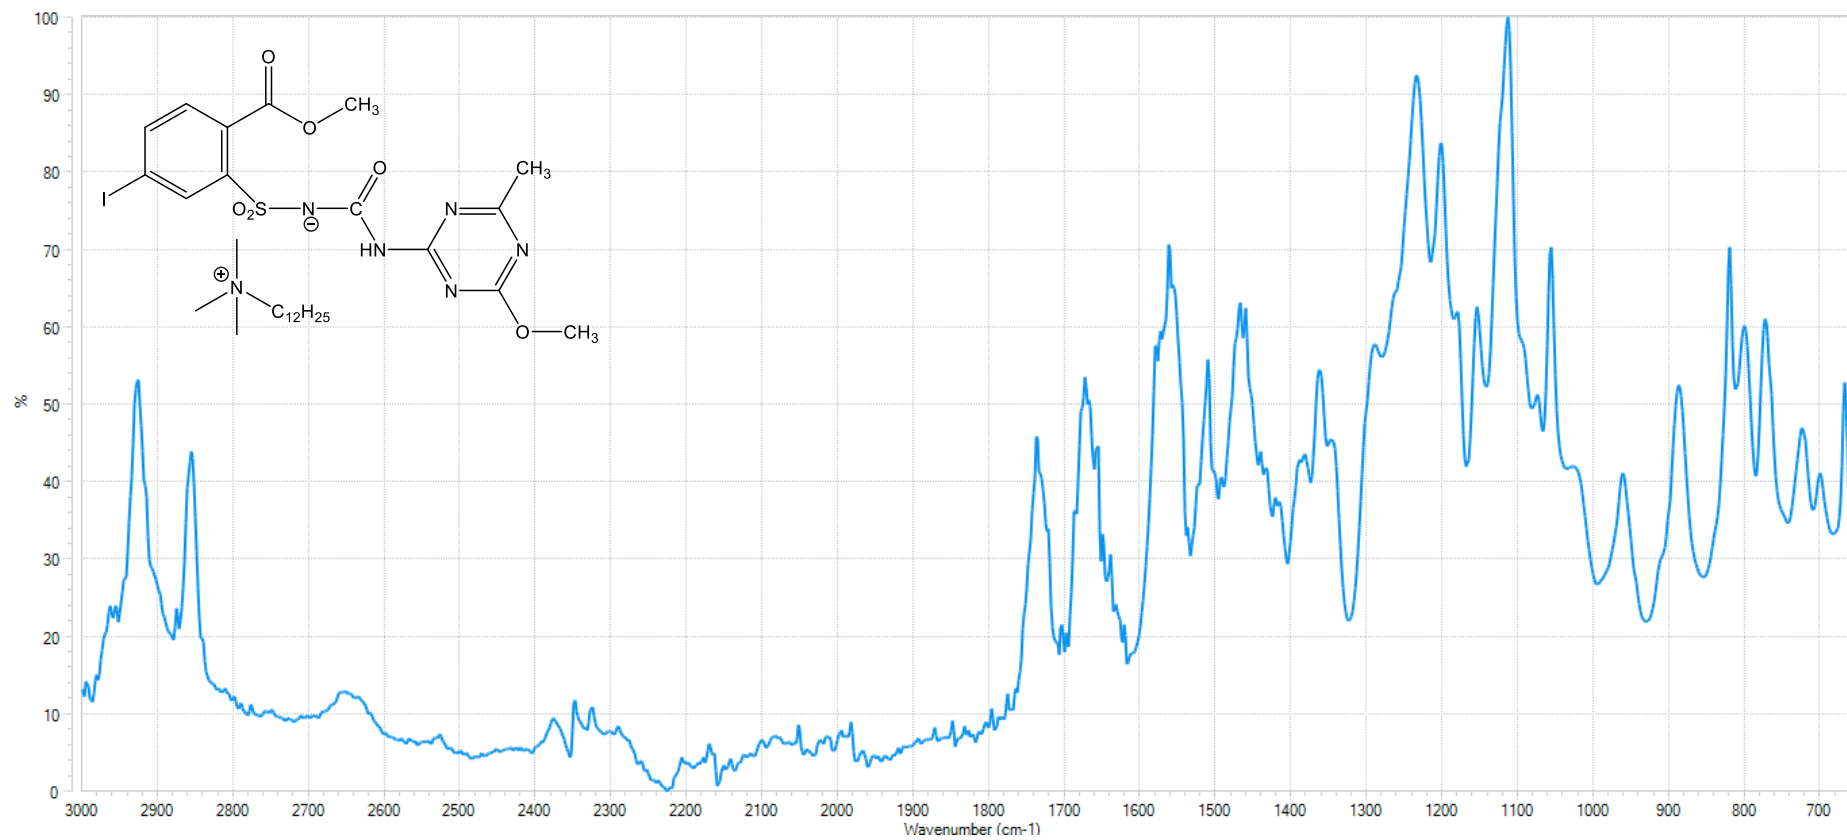

IR  $\nu_{\text{max}}$  [ $\text{cm}^{-1}$ ] = 2930, 2855, 1738, 1672, 1656, 1563, 1511, 1468, 1422, 1361, 1343, 1284, 1232, 1200, 1110, 1055, 888, 819, 771

**Figure S3.**  $^1\text{H}$  NMR spectrum of cocotrimethylammonium ((5-iodo-2-(methoxycarbonyl)phenyl)sulfonyl)((4-methoxy-6-methyl-1,3,5-triazin-2-yl)carbamoyl)amidate (**1**).

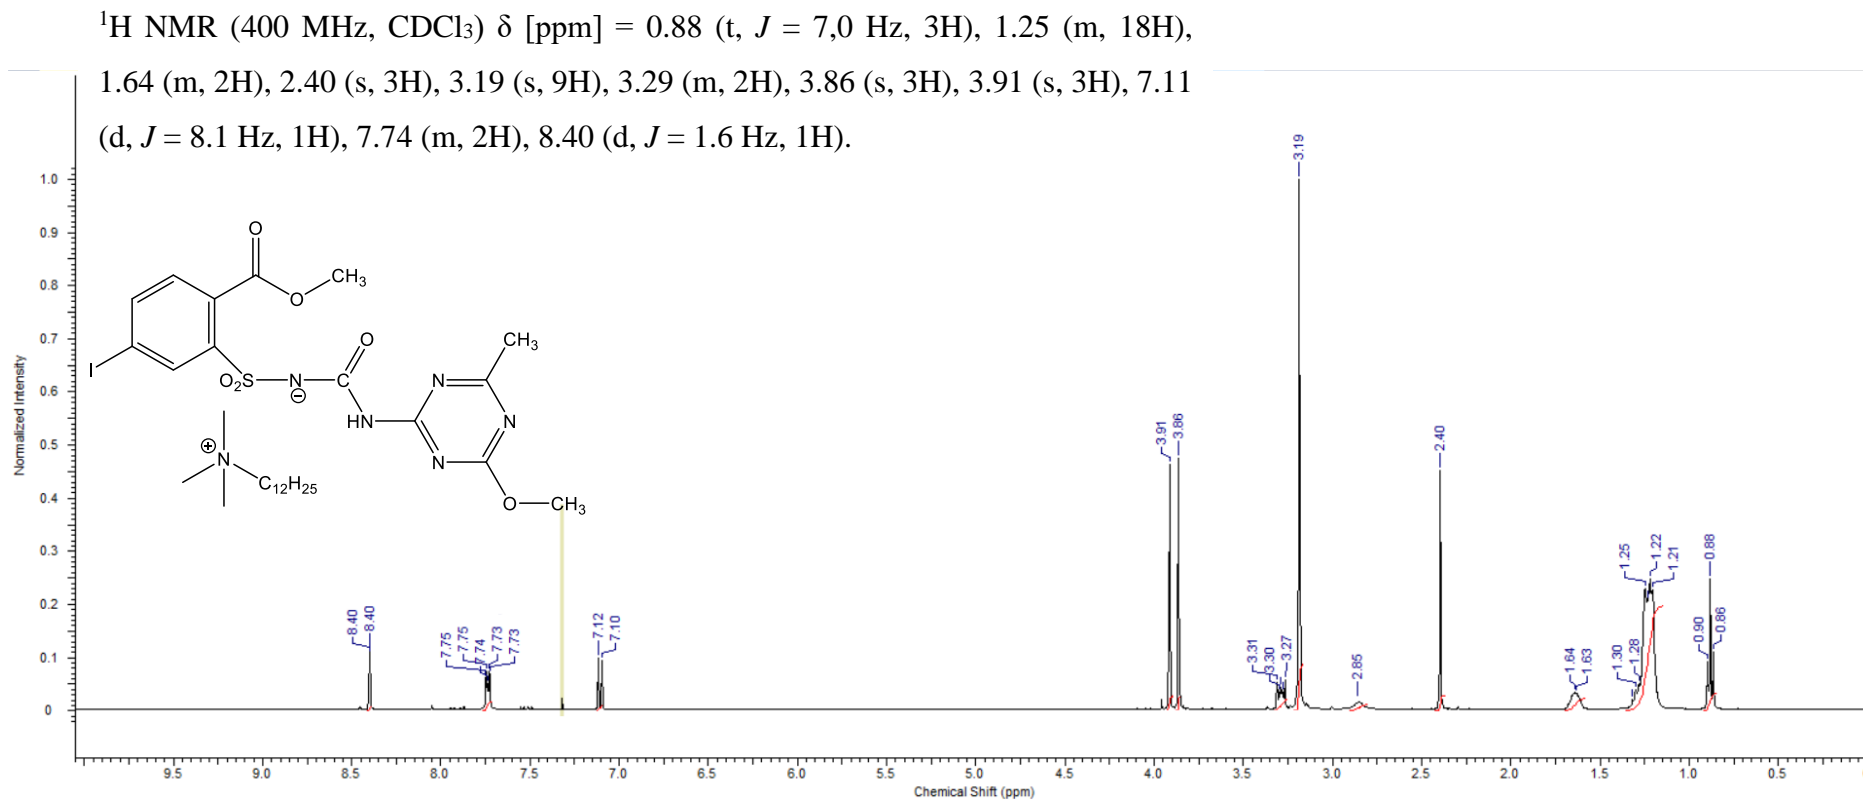

**Figure S4.**  $^{13}\text{C}$  NMR spectrum of cocotrimethylammonium ((5-iodo-2-(methoxycarbonyl)phenyl)sulfonyl)((4-methoxy-6-methyl-1,3,5-triazin-2-yl)carbamoyl)amidate (**1**).

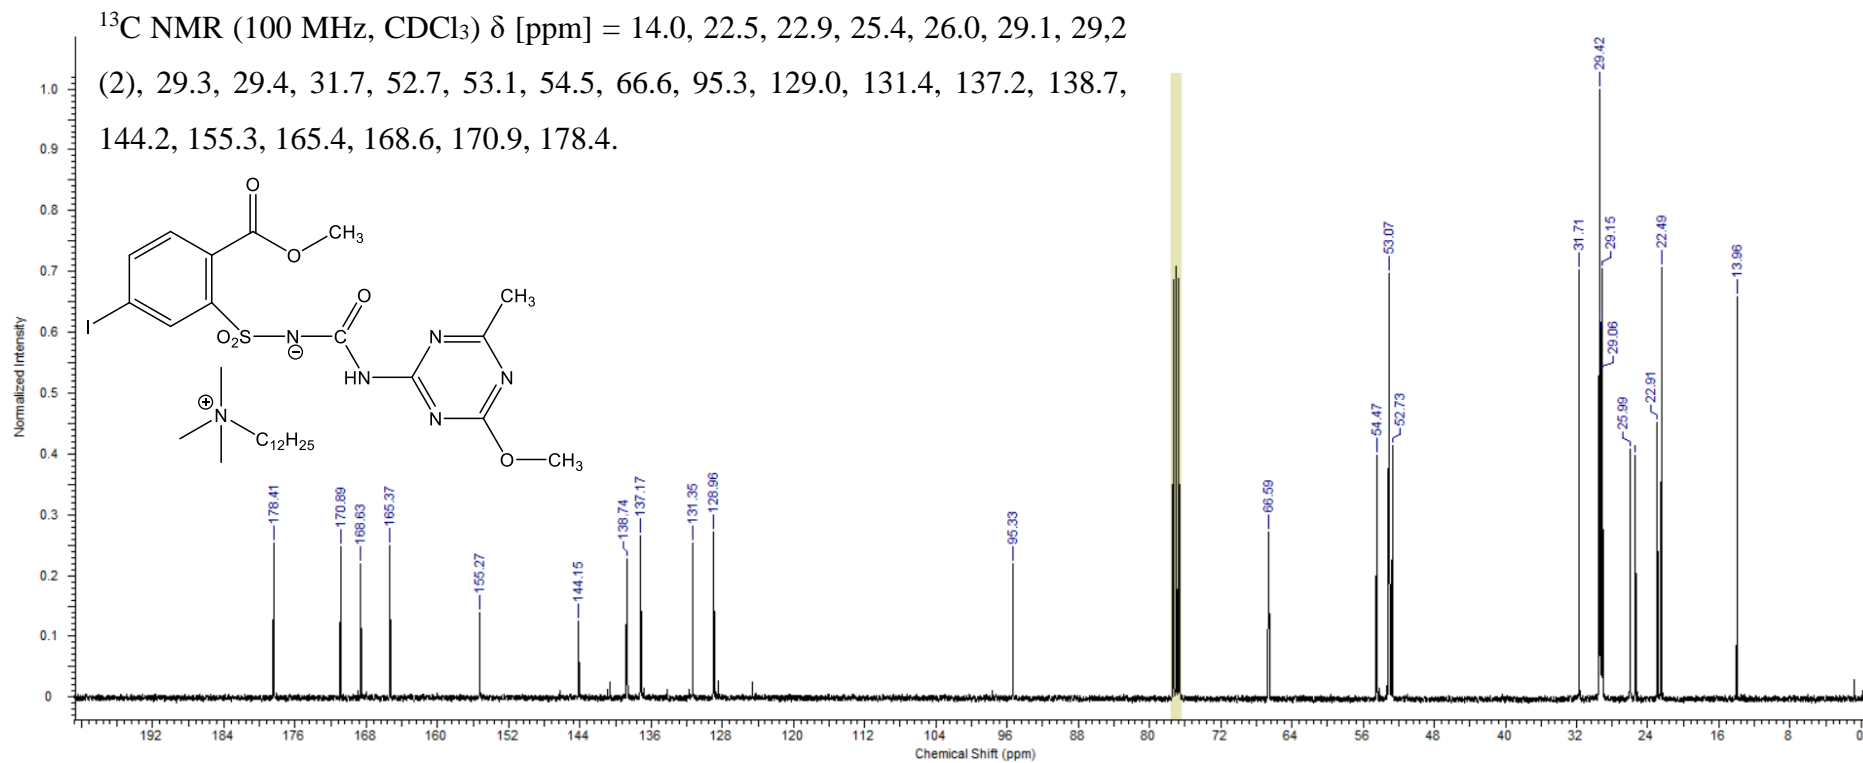

**Figure S5.** UV spectrum of tetradecyltrimethylammonium ((5-iodo-2-(methoxycarbonyl)phenyl)sulfonyl)((4-methoxy-6-methyl-1,3,5-triazin-2-yl)carbamoyl)amidate (**2**).

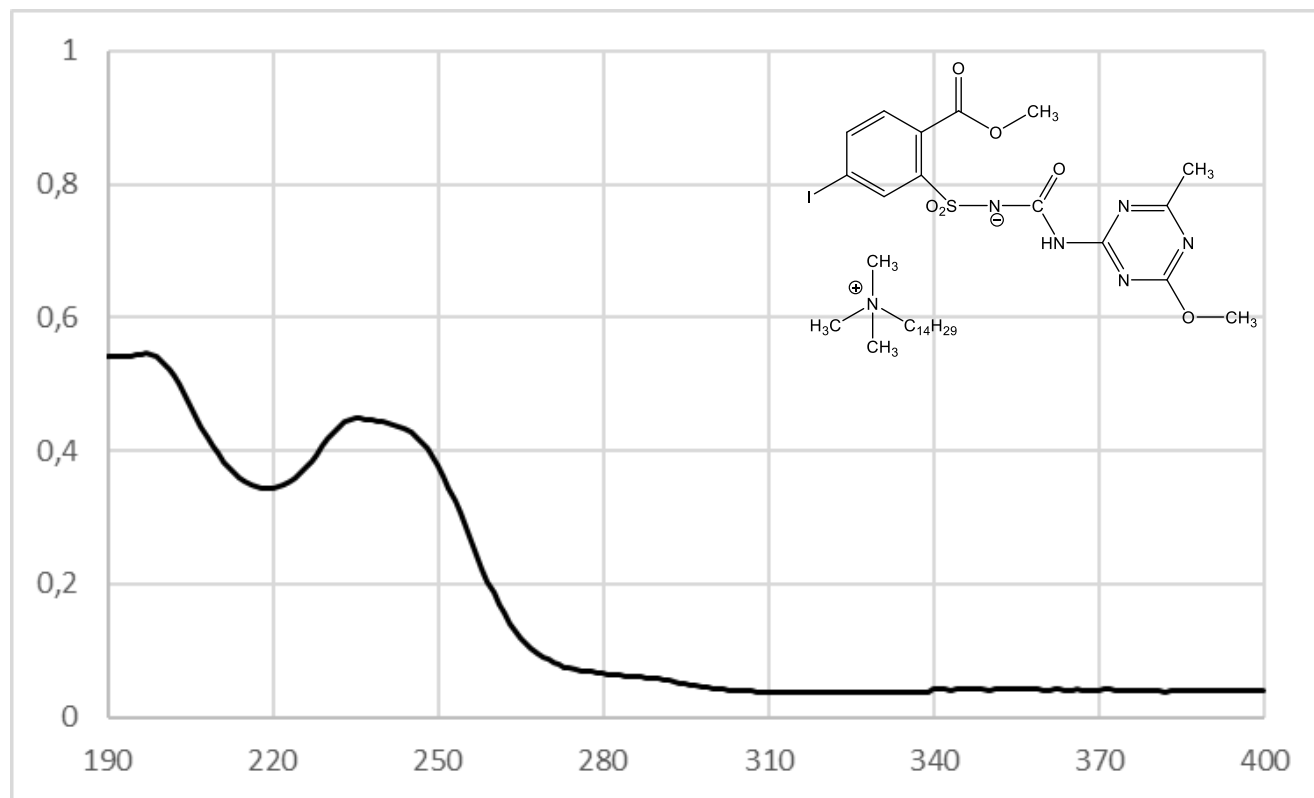

$$\lambda_{1\max}(\text{water}) = 197 \text{ nm}; \lambda_{2\max}(\text{water}) = 235 \text{ nm}$$

$$\varepsilon_{\lambda 1\max} = 3.07 \cdot 10^4 \text{ dm}^3 \text{ mol}^{-1} \text{ cm}^{-1}; \varepsilon_{\lambda 2\max} = 2.52 \cdot 10^4 \text{ dm}^3 \text{ mol}^{-1} \text{ cm}^{-1}$$

$$\varepsilon_{\lambda 1\max} / \varepsilon_{\lambda 2\max} = 1.22$$

**Figure S6.** FT-IR spectrum of tetradecyltrimethylammonium ((5-iodo-2-(methoxycarbonyl)phenyl)sulfonyl)((4-methoxy-6-methyl-1,3,5-triazin-2-yl)carbamoyl)amidate (**2**).

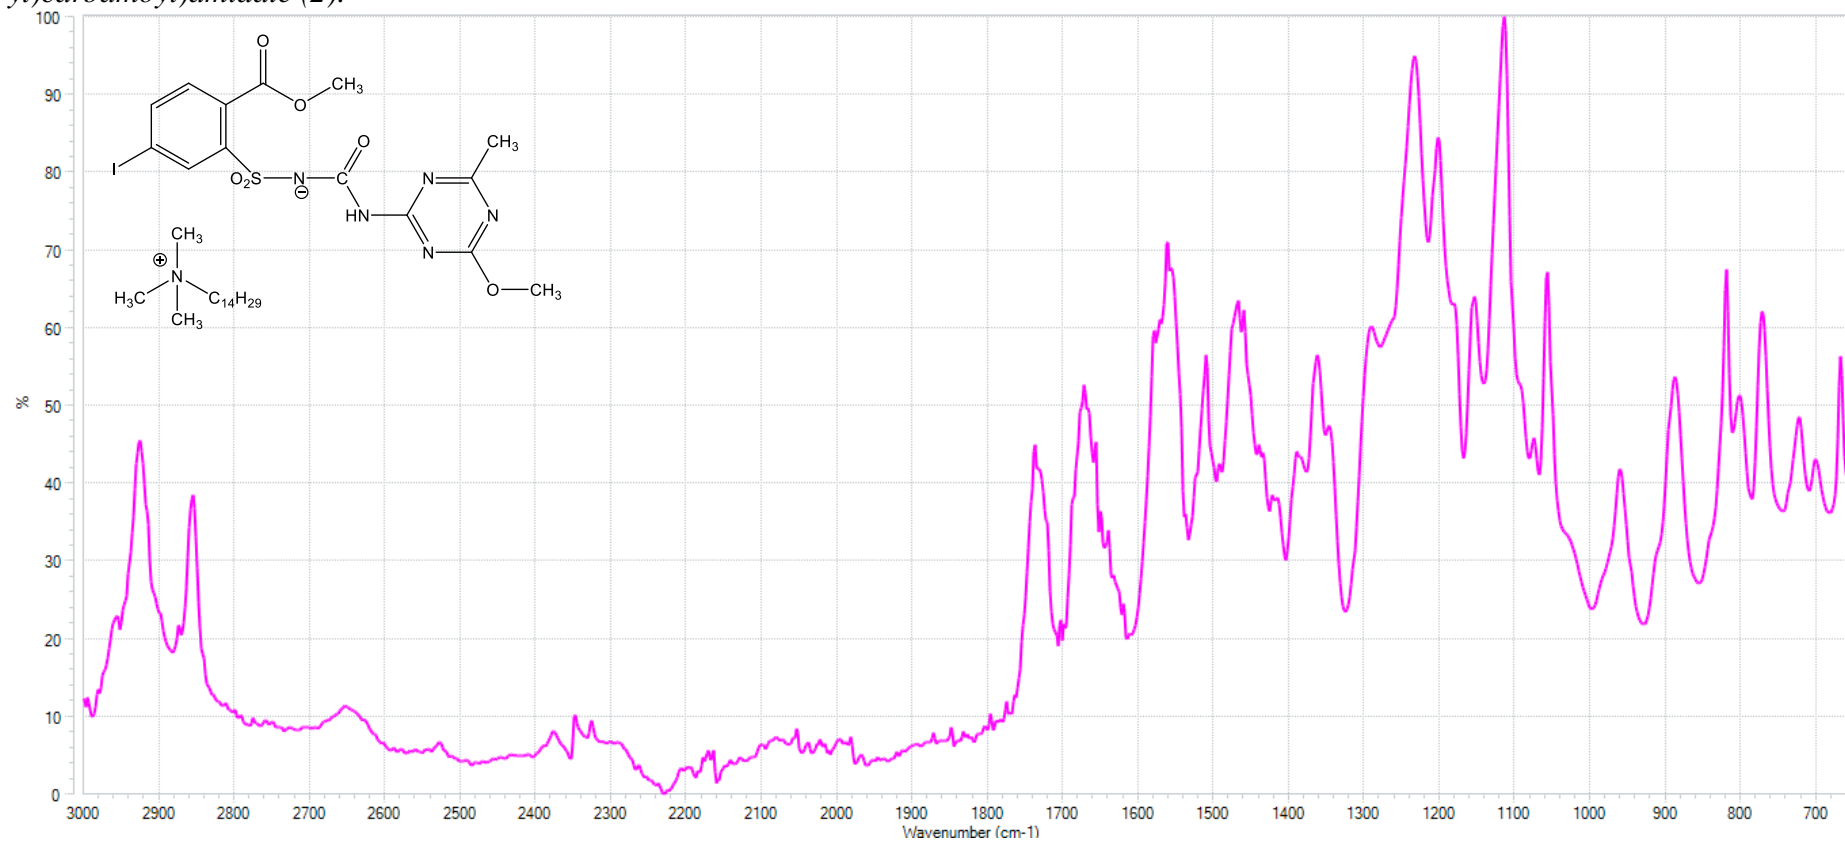

IR  $\nu_{\text{max}}$  [cm<sup>-1</sup>] = 2925, 2855, 1736, 1679, 1655, 1562, 1510, 1467, 1417, 1388, 1345, 1290, 1233, 1202, 1113, 1055, 887, 819, 773.



**Figure S7.**  $^1\text{H}$  NMR spectrum of tetradecyltrimethylammonium ((5-iodo-2-(methoxycarbonyl)phenyl)sulfonyl)((4-methoxy-6-methyl-1,3,5-triazin-2-yl)carbamoyl)amidate (**2**).

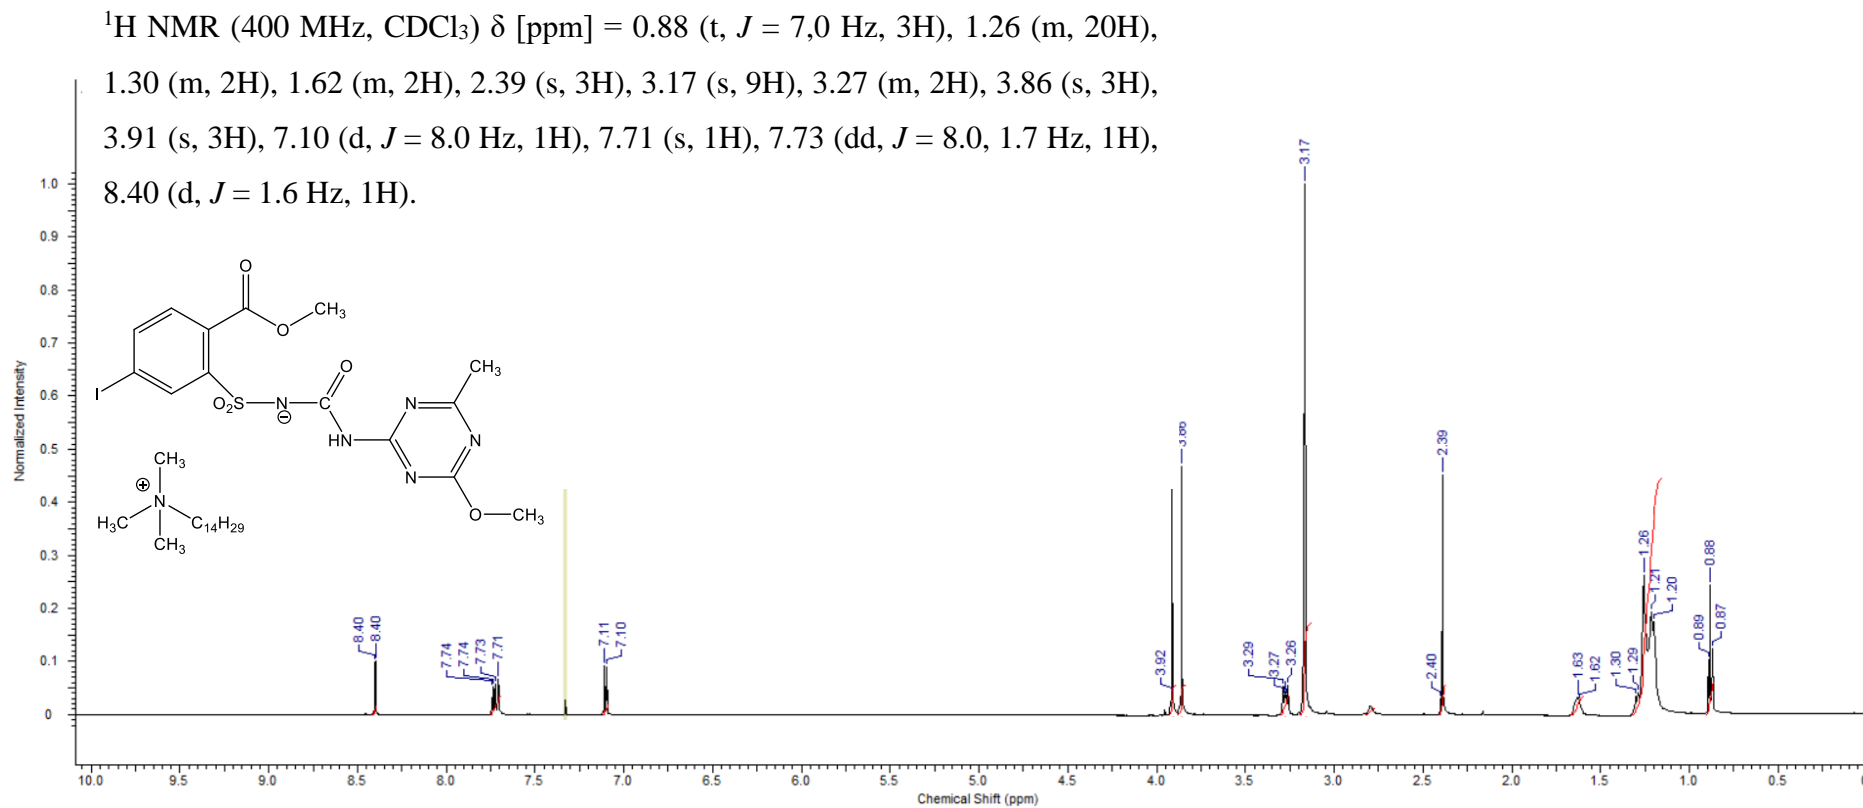

**Figure S8.**  $^{13}\text{C}$  NMR spectrum of tetradecyltrimethylammonium ((5-iodo-2-(methoxycarbonyl)phenyl)sulfonyl)((4-methoxy-6-methyl-1,3,5-triazin-2-yl)carbamoyl)amidate (**2**).

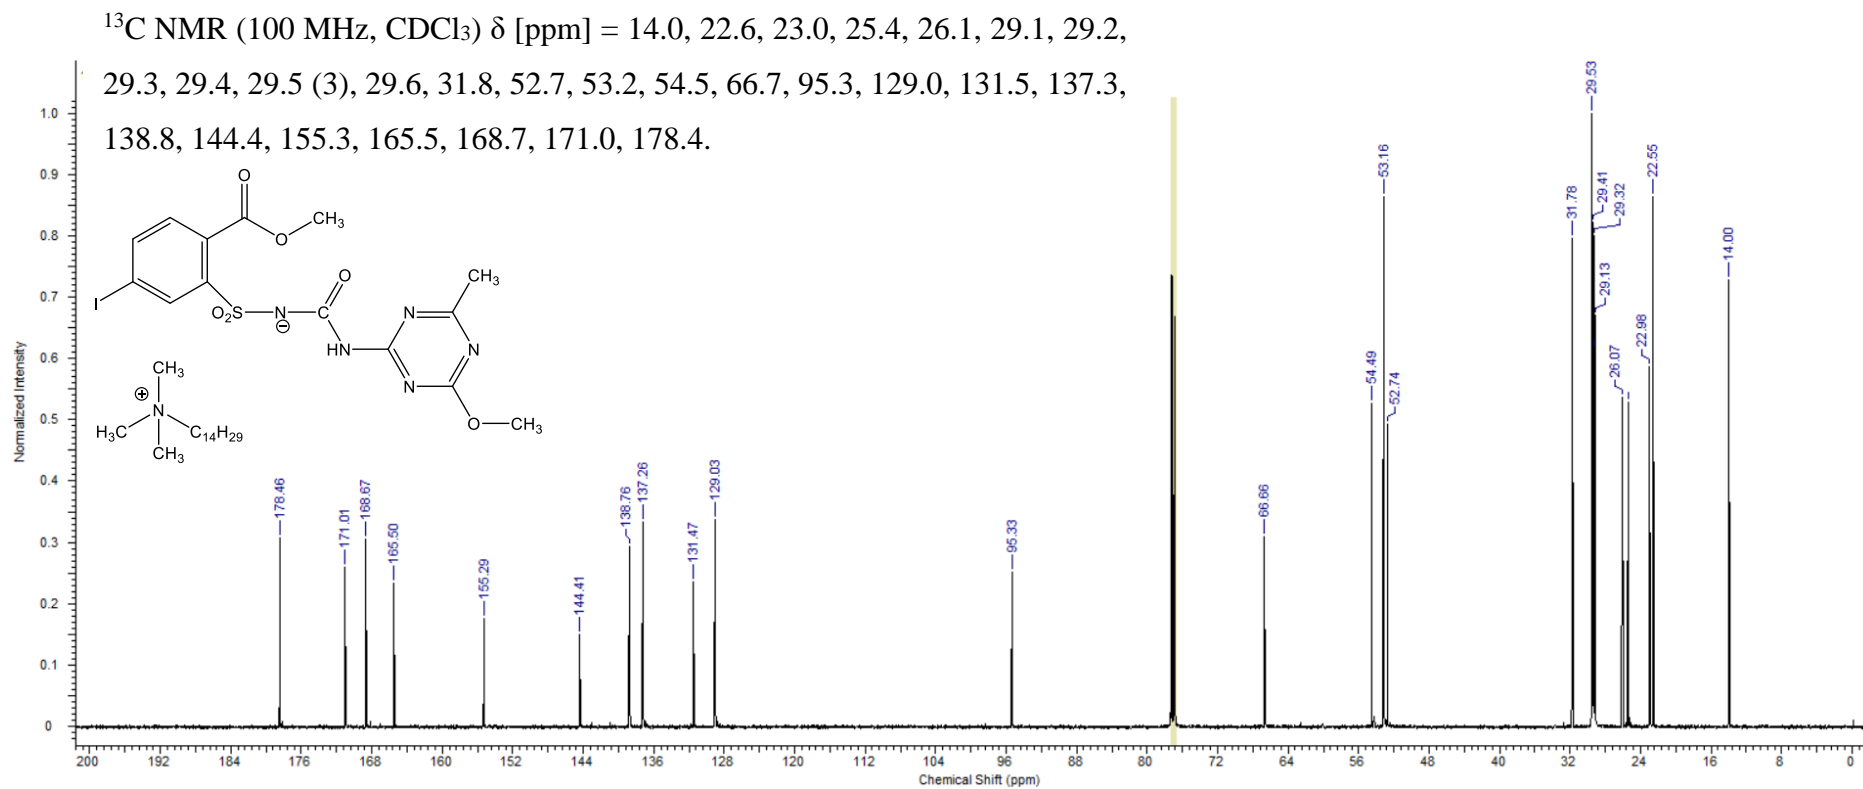

**Figure S9.** UV spectrum of hexadecyltrimethylammonium ammonium ((5-iodo-2-(methoxycarbonyl)phenyl)sulfonyl)((4-methoxy-6-methyl-1,3,5-triazin-2-yl)carbamoyl)amidate (**3**).

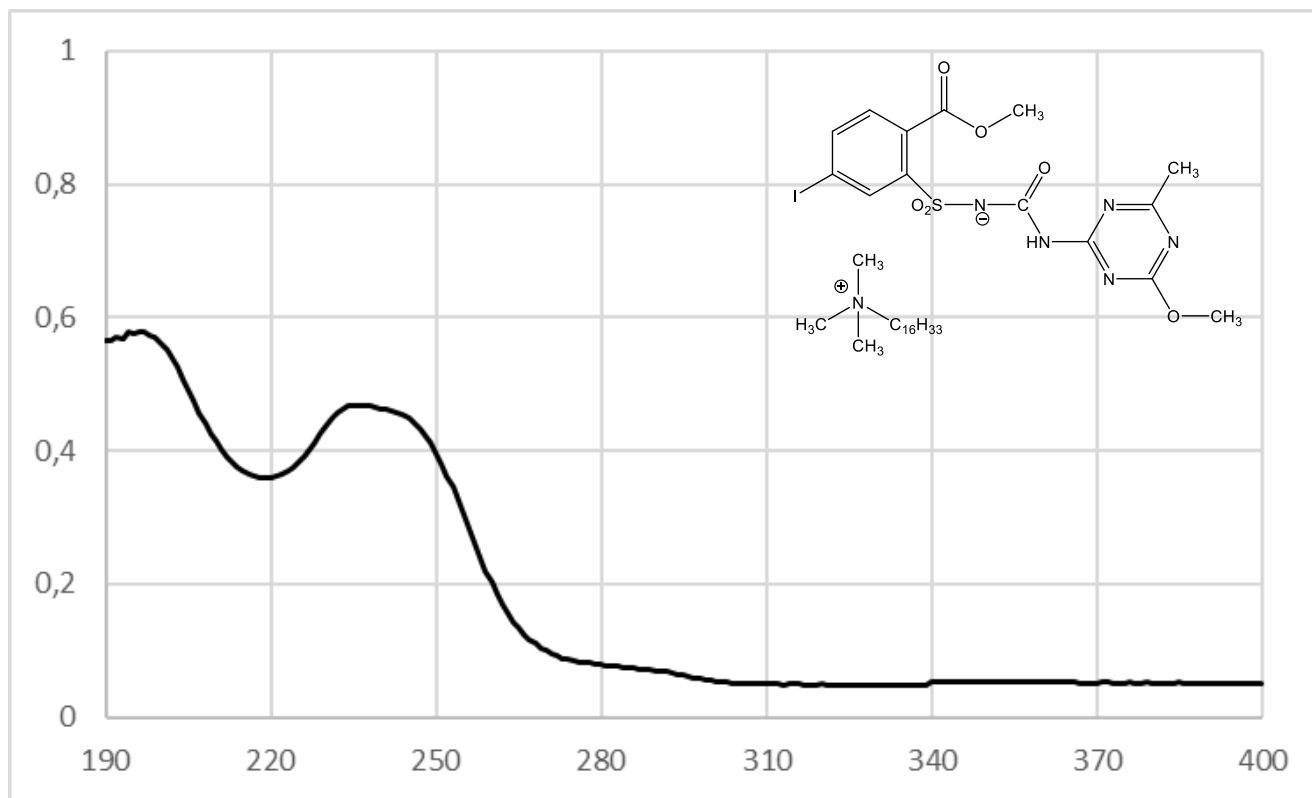

$$\lambda_{1max} (\text{water}) = 197 \text{ nm}; \lambda_{2max} (\text{water}) = 235 \text{ nm}$$

$$\varepsilon_{\lambda_{1max}} = 3.19 \cdot 10^4 \text{ dm}^3 \text{ mol}^{-1} \text{ cm}^{-1}; \varepsilon_{\lambda_{2max}} = 2.57 \cdot 10^4 \text{ dm}^3 \text{ mol}^{-1} \text{ cm}^{-1}$$

$$\varepsilon_{\lambda_{1max}} / \varepsilon_{\lambda_{2max}} = 1.24$$

**Figure S10.** FT-IR spectrum of hexadecyltrimethylammonium ((5-iodo-2-(methoxycarbonyl)phenyl)sulfonyl)((4-methoxy-6-methyl-1,3,5-triazin-2-yl)carbamoyl)amidate (**3**).

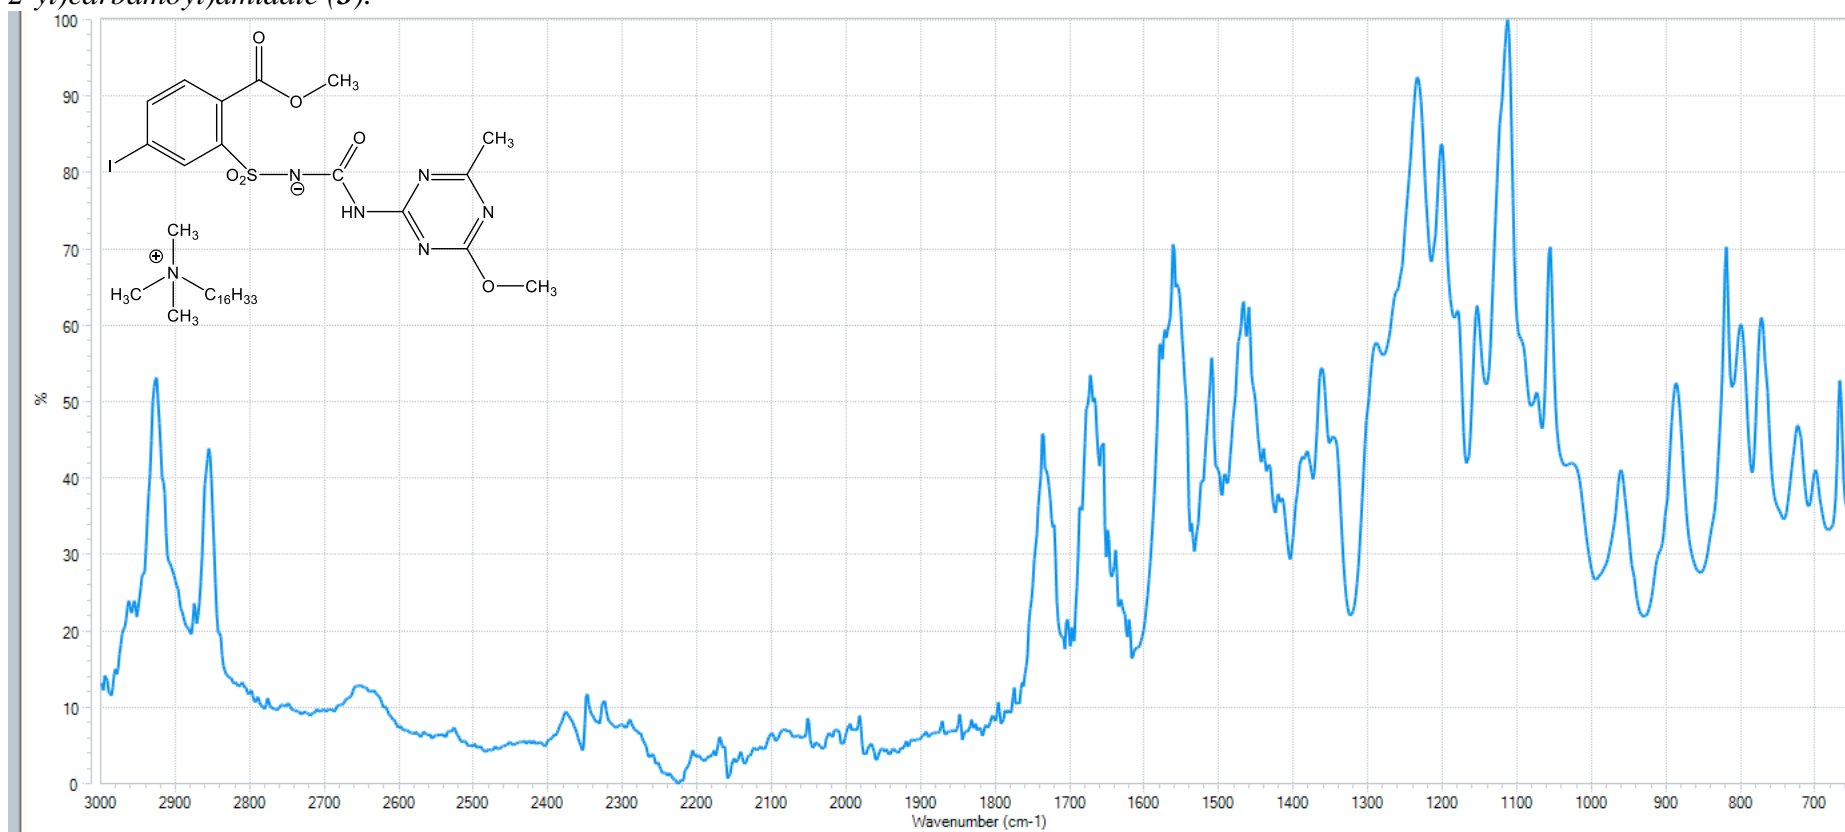

IR  $\nu_{\text{max}}$  [ $\text{cm}^{-1}$ ] = 2927, 2855, 1738, 1672, 1655, 1563, 1511, 1468, 1421, 1362, 1346, 1291, 1234, 1203, 1112, 1055, 887, 819, 772.

**Figure S11.**  $^1\text{H}$  NMR spectrum of hexadecyltrimethylammonium ((5-iodo-2-(methoxycarbonyl)phenyl)sulfonyl)((4-methoxy-6-methyl-1,3,5-triazin-2-yl)carbamoyl)amidate (**3**).

$^1\text{H}$  NMR (400 MHz,  $\text{CDCl}_3$ )  $\delta$  [ppm] = 0.88 (t,  $J$  = 6,8 Hz, 3H), 1.26 (m, 26H), 1.63 (m, 2H), 2.39 (s, 3H), 3.18 (s, 9H), 3.28 (m, 2H), 3.86 (s, 3H), 3.91 (s, 3H), 7.11 (d,  $J$  = 7.9 Hz, 1H), 7.74 (m, 2H), 8.40 (d,  $J$  = 1.8 Hz, 1H).

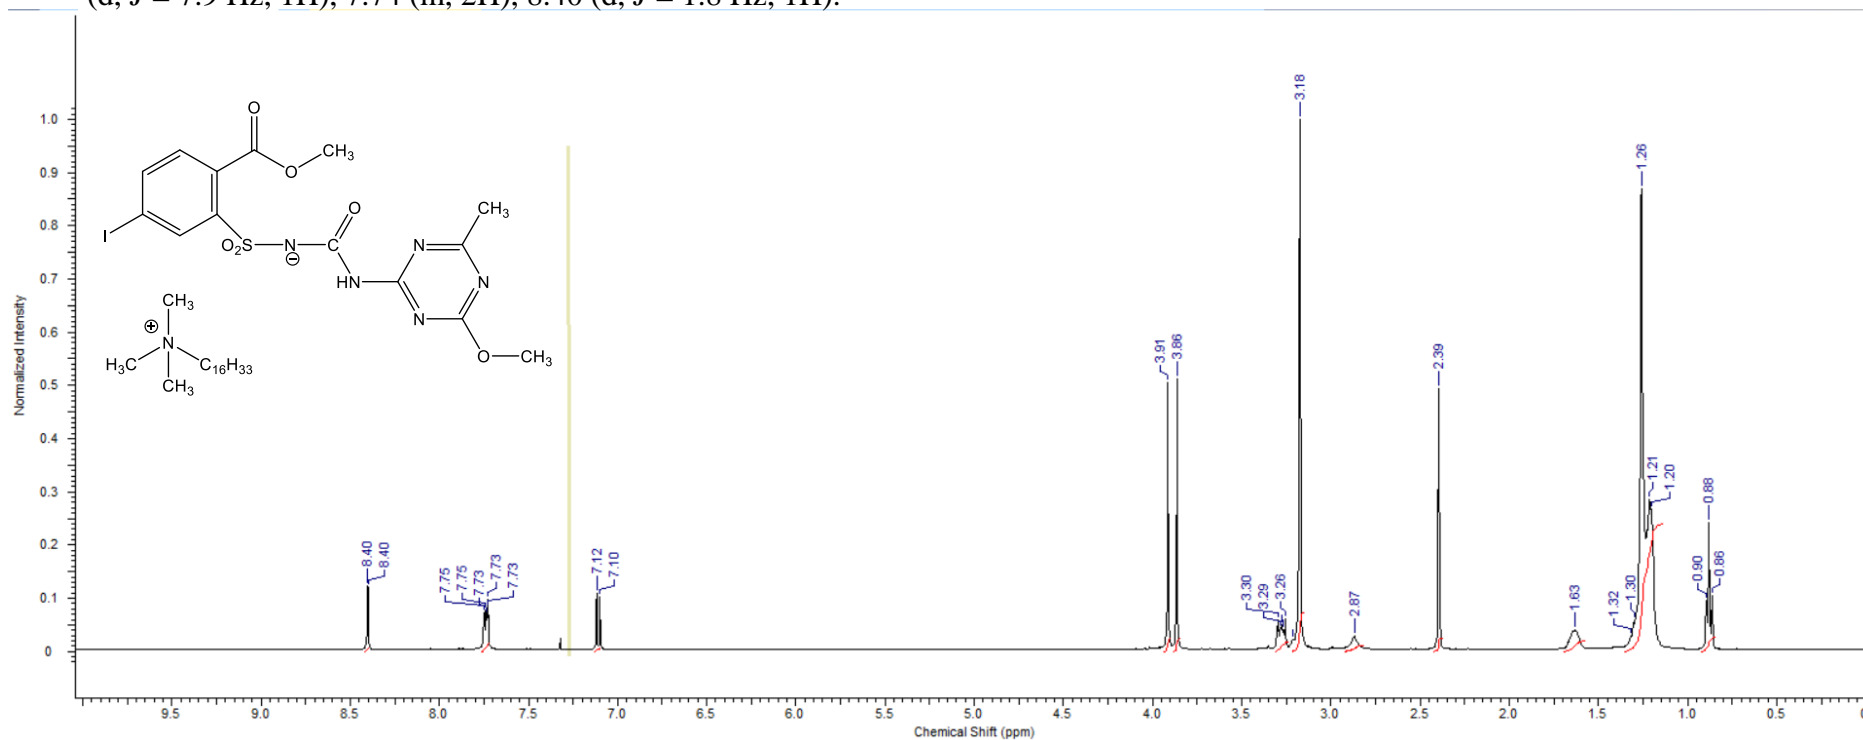

**Figure S12.**  $^{13}\text{C}$  NMR spectrum of hexadecyltrimethylammonium ((5-iodo-2-(methoxycarbonyl)phenyl)sulfonyl)((4-methoxy-6-methyl-1,3,5-triazin-2-yl)carbamoyl)amidate (**3**).

$^{13}\text{C}$  NMR (100 MHz,  $\text{CDCl}_3$ )  $\delta$  [ppm] = 14.0, 22.5, 22.9, 25.4, 26.0, 29.1, 29.2, 29.3, 29.4, 29.5

(2), 31.7, 52.7, 53.1, 54.5, 66.6, 95.3, 129.0, 131.3, 137.2, 138.7, 144.2, 155.3, 165.4, 168.6,

170.9, 178.4.

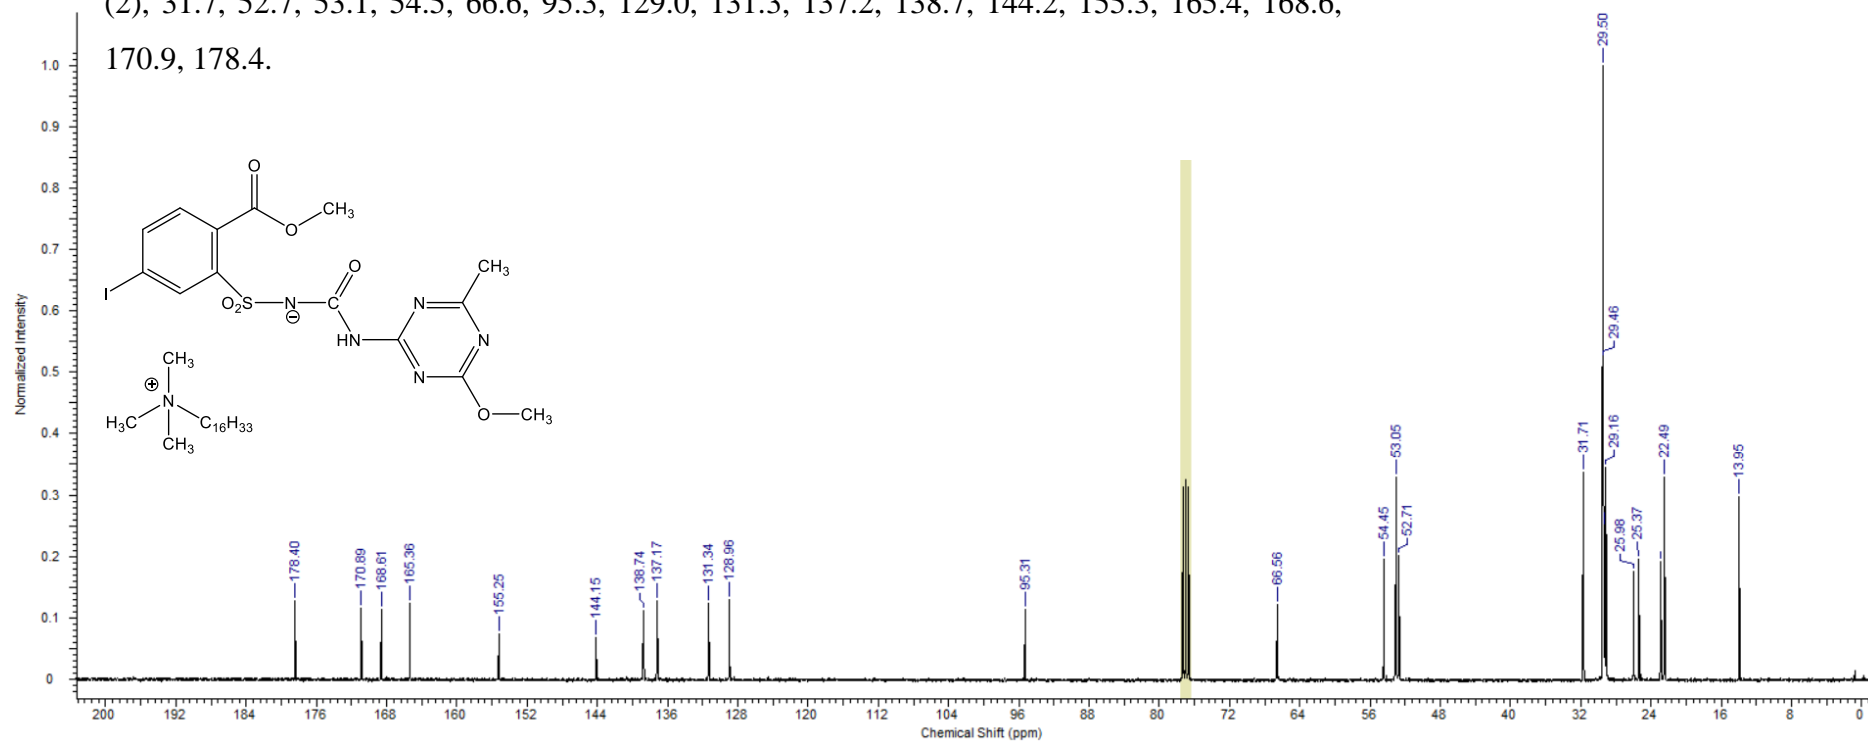

**Figure S13.** UV spectrum of octadecyltrimethylammonium ((5-iodo-2-(methoxycarbonyl)phenyl)sulfonyl)((4-methoxy-6-methyl-1,3,5-triazin-2-yl)carbamoyl)amidate (**4**).

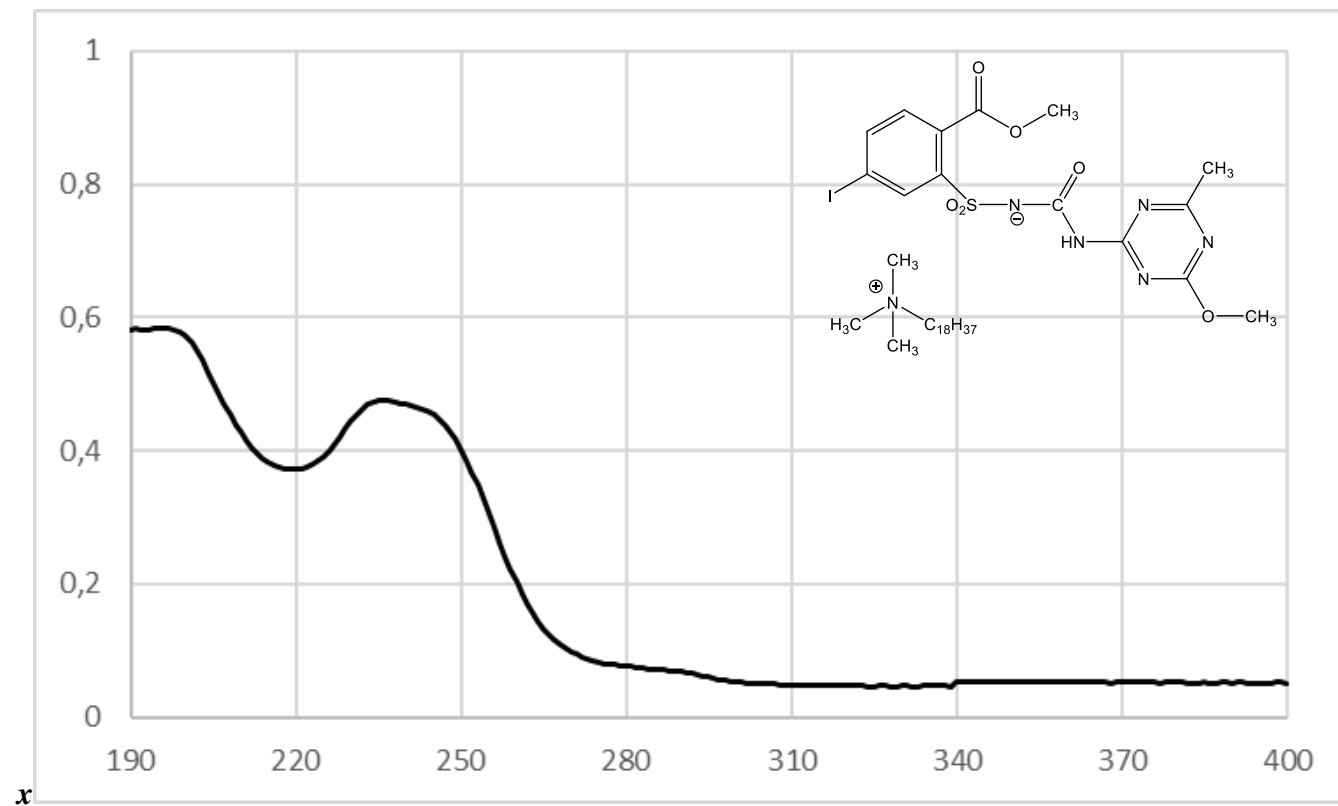

$$\lambda_{1\max}(\text{water}) = 197 \text{ nm}; \lambda_{2\max}(\text{water}) = 235 \text{ nm}$$

$$\varepsilon_{\lambda 1\max} = 2.89 \cdot 10^4 \text{ dm}^3 \text{ mol}^{-1} \text{ cm}^{-1}; \varepsilon_{\lambda 2\max} = 2.34 \cdot 10^4 \text{ dm}^3 \text{ mol}^{-1} \text{ cm}^{-1}$$

$$\varepsilon_{\lambda 1\max} / \varepsilon_{\lambda 2\max} = 1.23$$

**Figure S14.** FT-IR spectrum of octadecyltrimethylammonium ((5-iodo-2-(methoxycarbonyl)phenyl)sulfonyl)((4-methoxy-6-methyl-1,3,5-triazin-2-yl)carbamoyl)amidate (**4**).

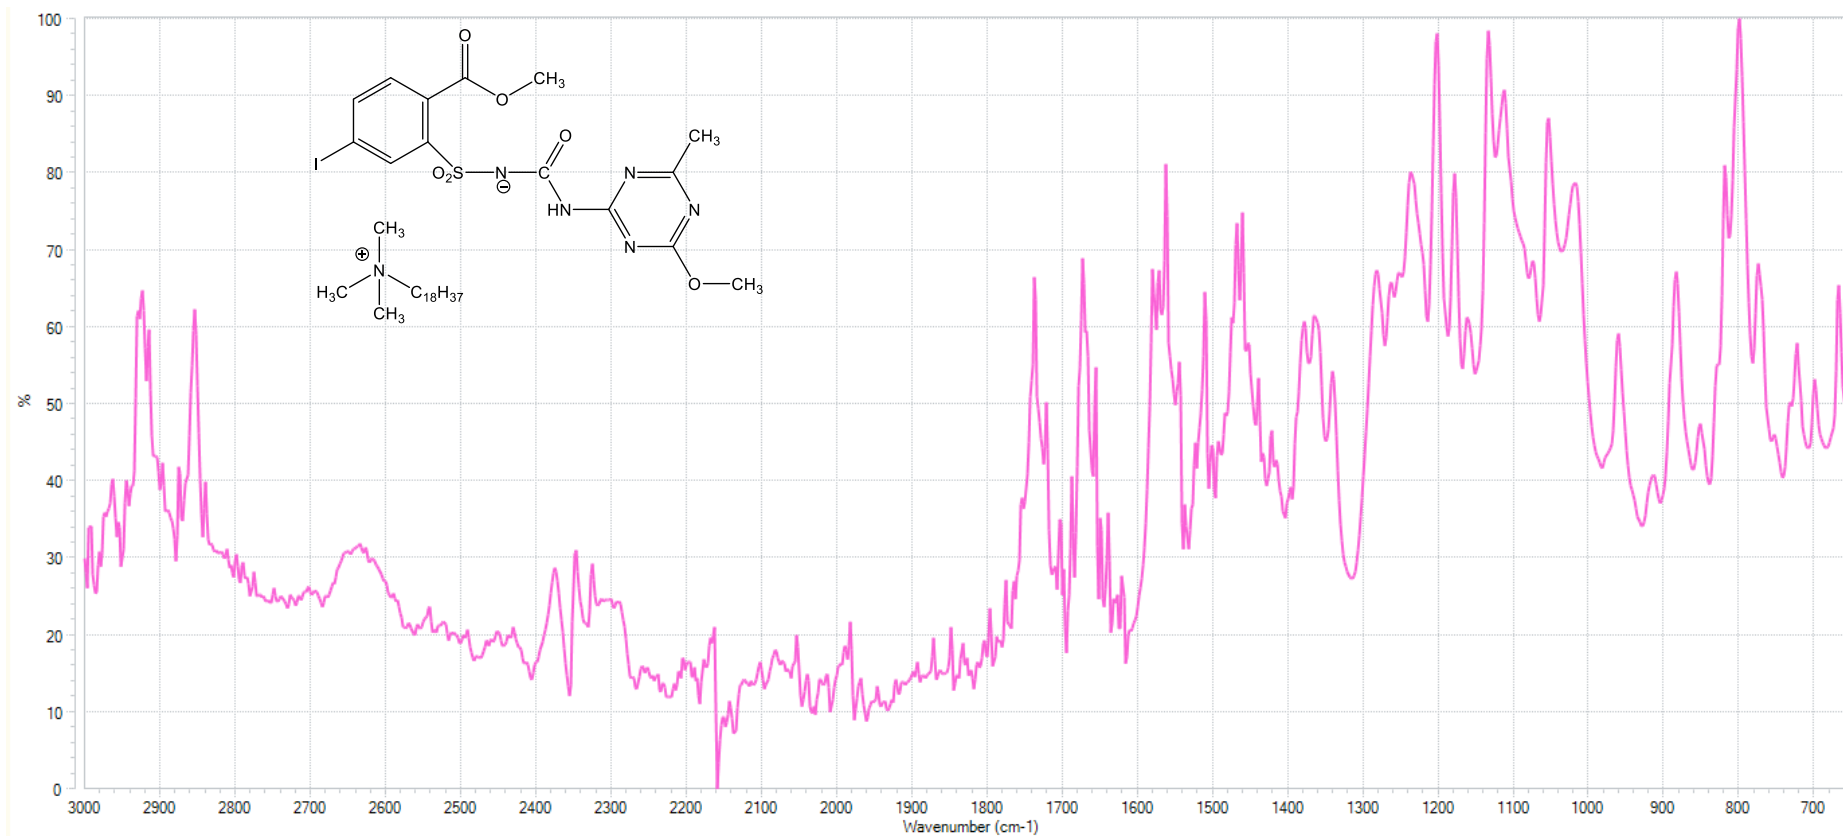

IR  $\nu_{\text{max}}$  [cm<sup>-1</sup>] = 2923, 2853, 1738, 1671, 1655, 1562, 1510, 1467, 1421, 1365, 1340, 1281, 1236, 1200, 1111, 1054, 884, 819, 721.



**Figure S15.**  $^1\text{H}$  NMR spectrum of octadecyltrimethylammonium ((5-iodo-2-(methoxycarbonyl)phenyl)sulfonyl)((4-methoxy-6-methyl-1,3,5-triazin-2-yl)carbamoyl)amidate (**4**).

$^1\text{H}$  NMR (400 MHz,  $\text{CDCl}_3$ )  $\delta$  [ppm] = 0.88 (t,  $J$  = 6,7 Hz, 3H), 1.25 (m, 30H), 1.64 (m, 2H), 2.39 (s, 3H), 3.18 (s, 9H), 3.28 (m, 2H), 3.86 (s, 3H), 3.91 (s, 3H), 7.11 (d,  $J$  = 7.9 Hz, 1H), 7.73 (m, 2H), 8.40 (m, 1H).

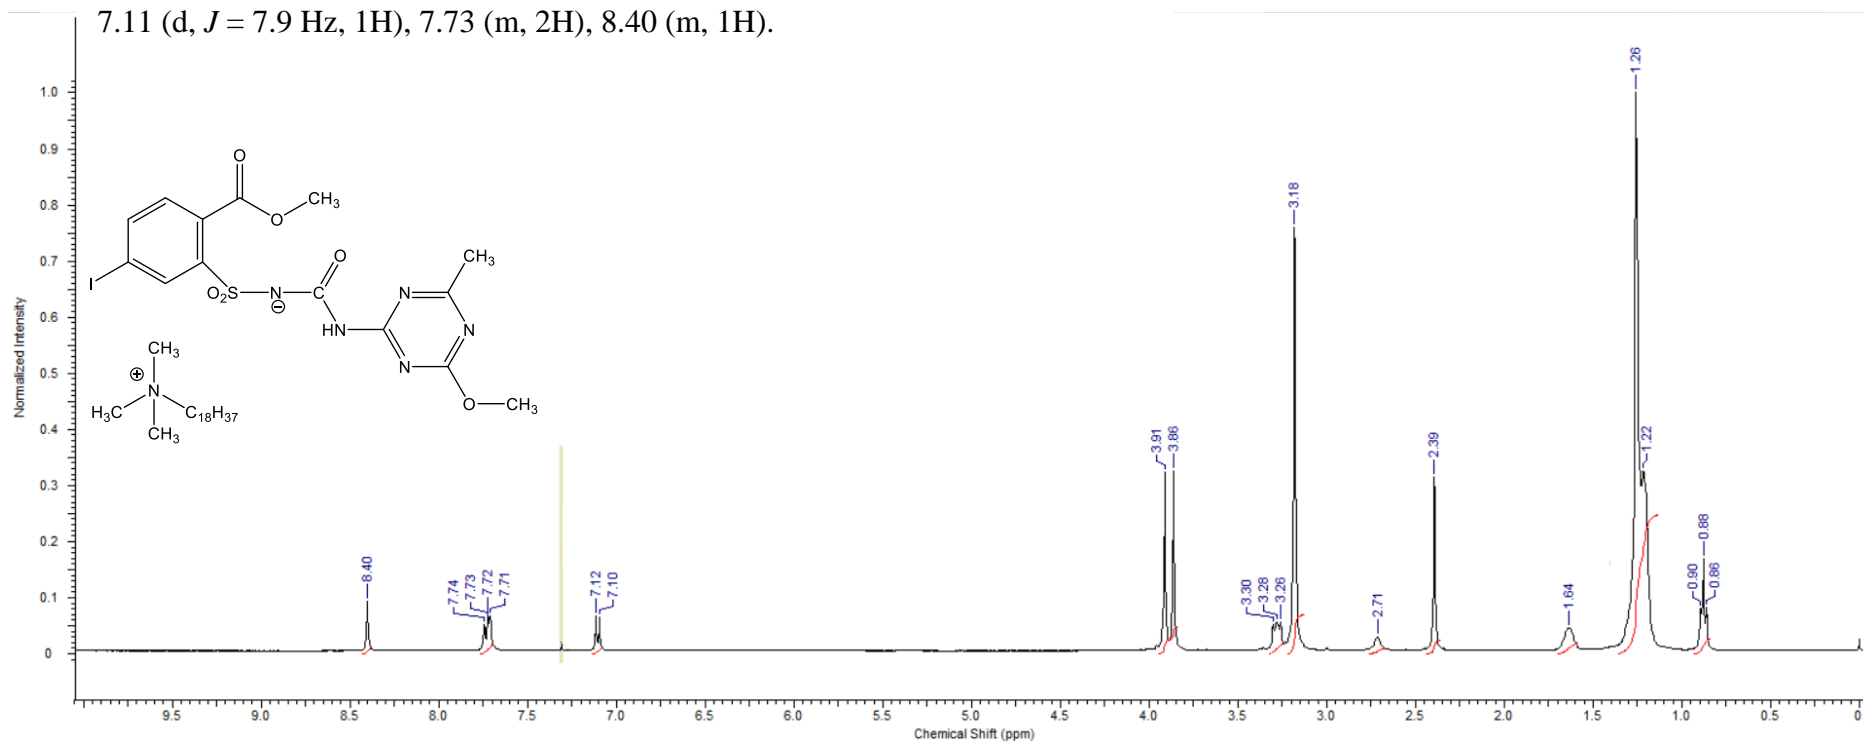

**Figure S16.**  $^{13}\text{C}$  NMR spectrum of octadecyltrimethylammonium ((5-iodo-2-(methoxycarbonyl)phenyl)sulfonyl)((4-methoxy-6-methyl-1,3,5-triazin-2-yl)carbamoyl)amidate (**4**).

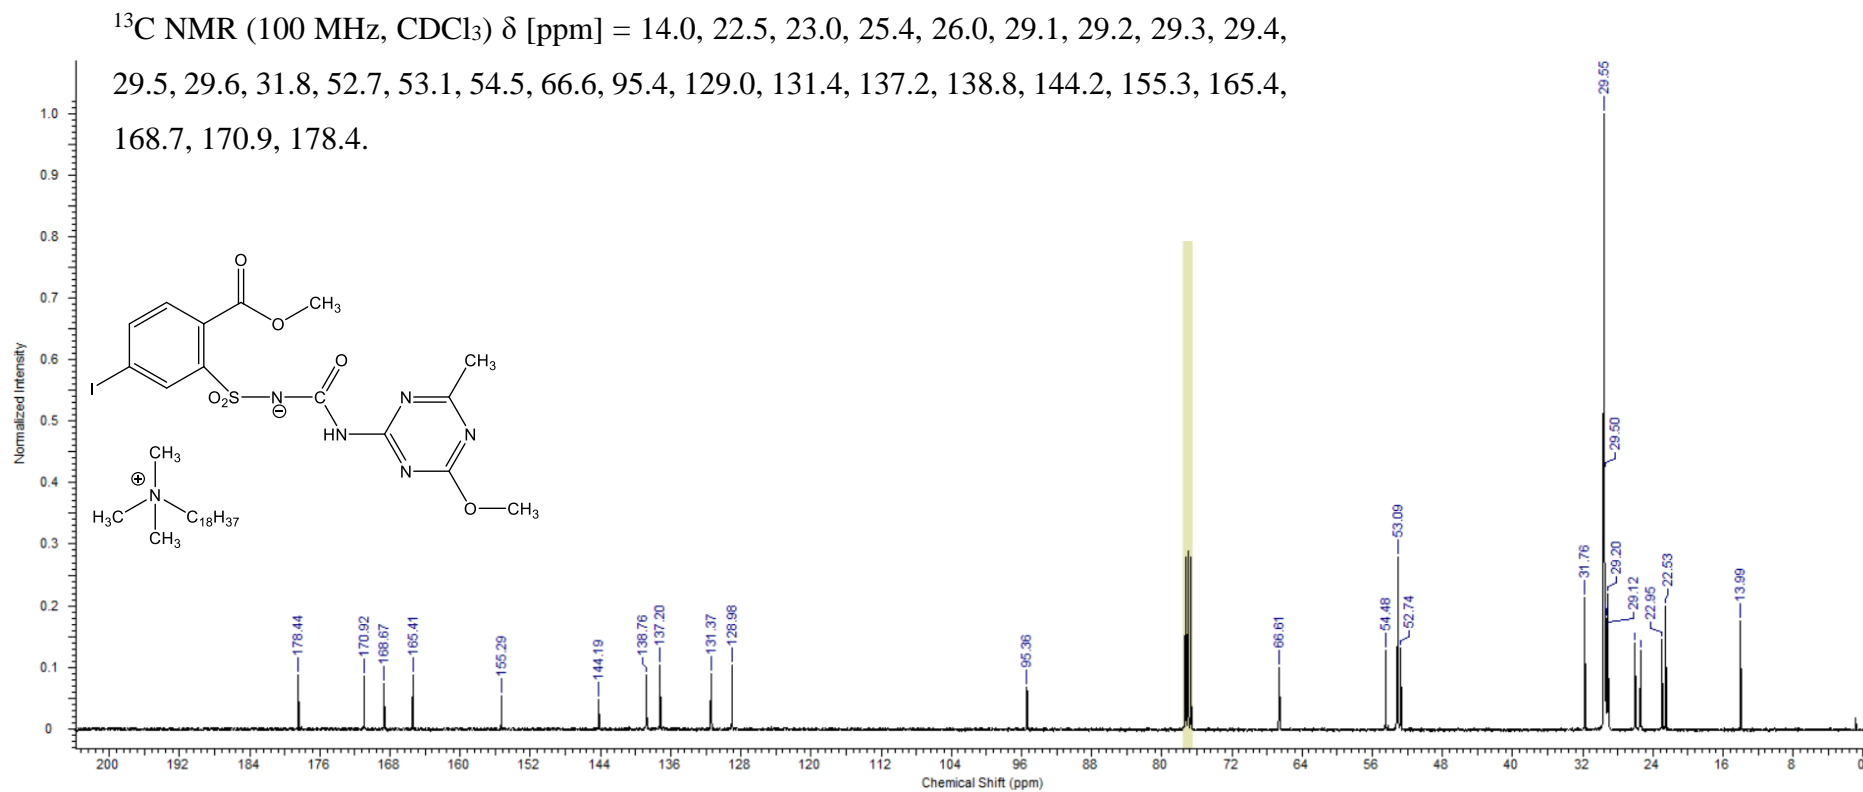

**Figure S17.** UV spectrum of docosyltrimethylammonium ((5-iodo-2-(methoxycarbonyl)phenyl)sulfonyl)((4-methoxy-6-methyl-1,3,5-triazin-2-yl)carbamoyl)amidate (5).

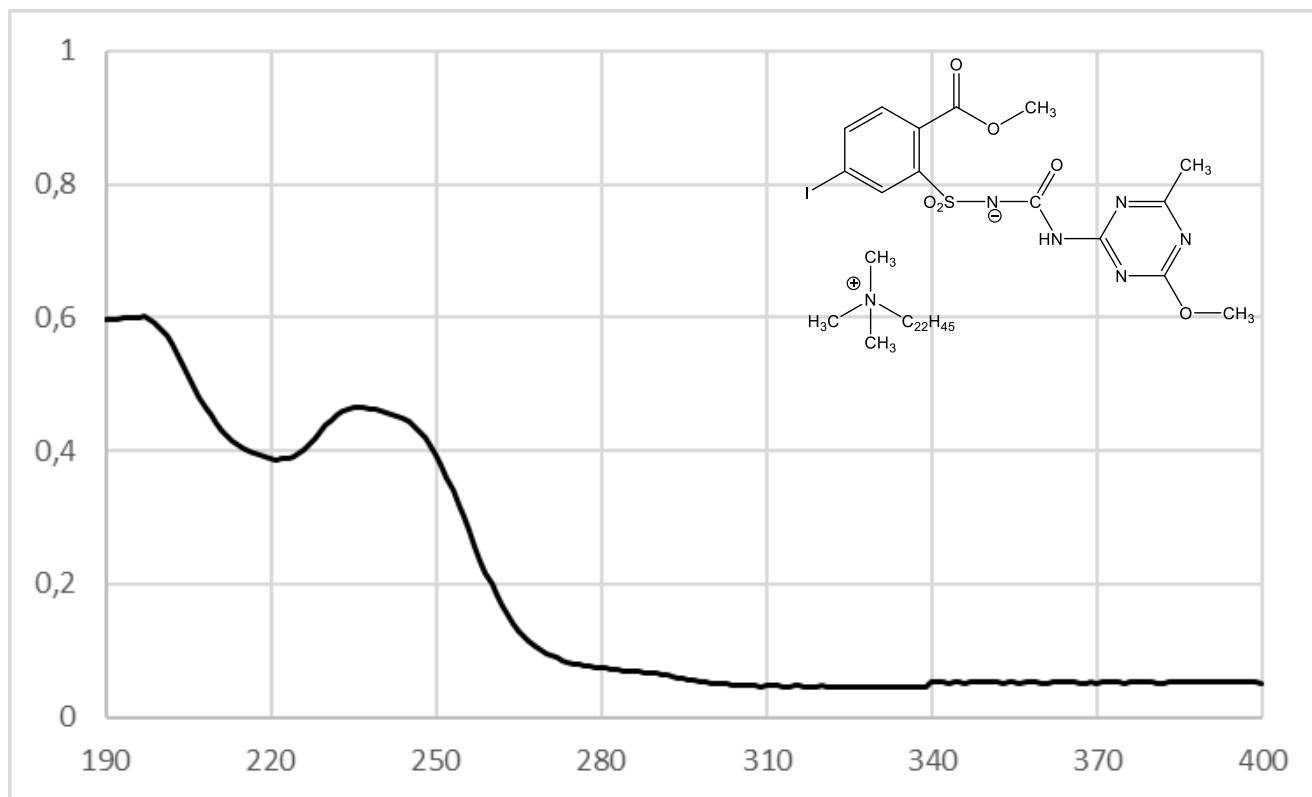

$$\lambda_{1max} (\text{water}) = 197 \text{ nm}; \lambda_{2max} (\text{water}) = 235 \text{ nm}$$

$$\varepsilon_{\lambda 1max} = 3.13 \cdot 10^4 \text{ dm}^3 \text{ mol}^{-1} \text{ cm}^{-1}; \varepsilon_{\lambda 2max} = 2.42 \cdot 10^4 \text{ dm}^3 \text{ mol}^{-1} \text{ cm}^{-1}$$

$$\varepsilon_{\lambda 1max} / \varepsilon_{\lambda 2max} = 1.30$$

**Figure S18.** FT-IR spectrum of docosyltrimethylammonium ((5-iodo-2-(methoxycarbonyl)phenyl)sulfonyl)((4-methoxy-6-methyl-1,3,5-triazin-2-yl)carbamoyl)amidate (**5**).

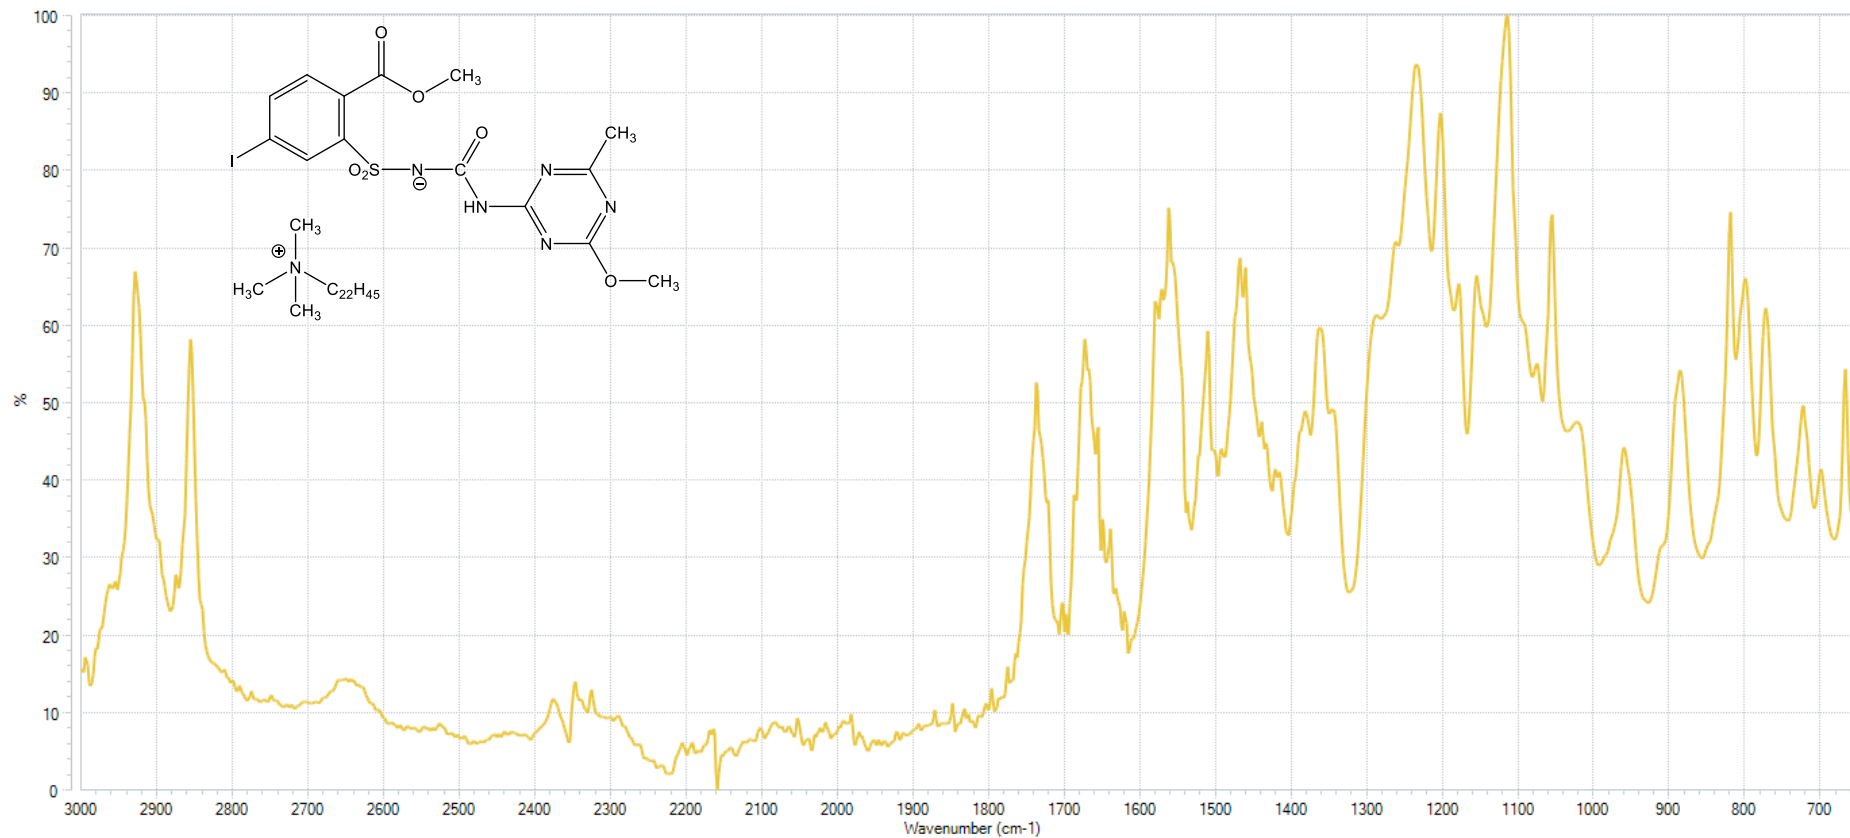

IR  $\nu_{\text{max}}$  [cm<sup>-1</sup>] = 2928, 2855, 1738, 1671, 1655, 1562, 1510, 1467, 1421, 1362, 1344, 1261, 1234, 1202, 1113, 1055, 885, 819, 722.

**Figure S19.**  $^1\text{H}$  NMR spectrum of docosyltrimethylammonium ((5-iodo-2-(methoxycarbonyl)phenyl)sulfonyl)((4-methoxy-6-methyl-1,3,5-triazin-2-yl)carbamoyl)amidate (**5**).

$^1\text{H}$  NMR (300 MHz,  $\text{CDCl}_3$ )  $\delta$  [ppm] = 0.88 (m, 3H), 1.25 (m, 38H), 1.64 (m, 2H), 2.39 (s, 3H), 3.18 (s, 9H), 3.27 (m, 2H), 3.86 (s, 3H), 3.91 (s, 3H), 7.10 (d,  $J$  = 8.0 Hz, 1H), 7.73 (m, 2H), 8.40 (d,  $J$  = 1.7 Hz, 1H).

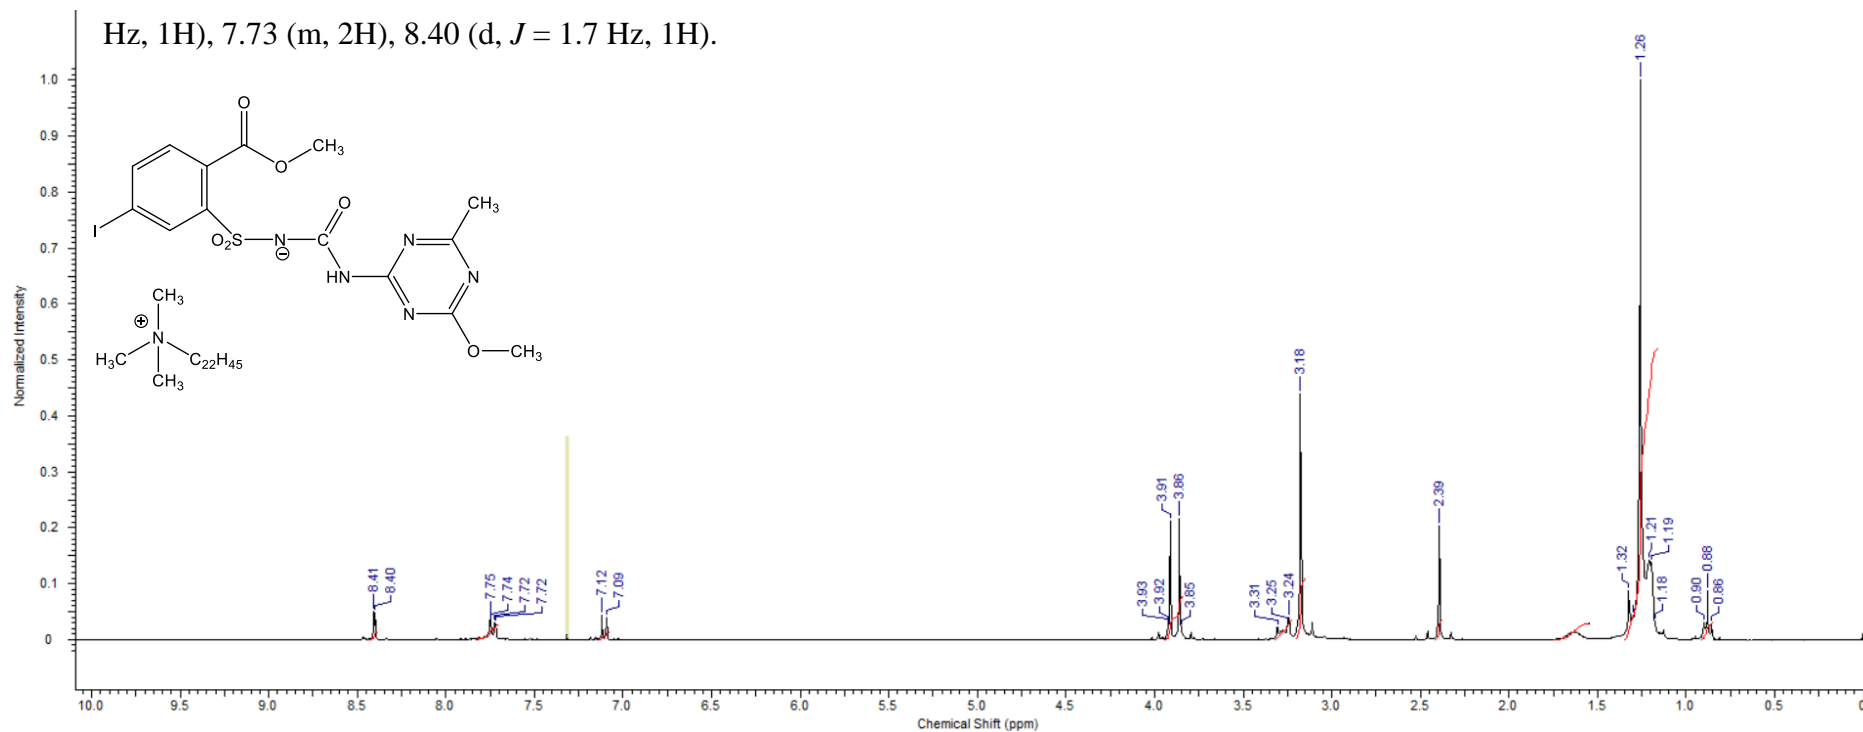

**Figure S20.**  $^{13}\text{C}$  NMR spectrum of docosyltrimethylammonium ((5-iodo-2-(methoxycarbonyl)phenyl)sulfonyl)((4-methoxy-6-methyl-1,3,5-triazin-2-yl)carbamoyl)amidate (**5**).

$^{13}\text{C}$  NMR (75 MHz,  $\text{CDCl}_3$ )  $\delta$  [ppm] = 14.0, 22.5, 22.9, 25.4, 26.0, 29.1, 29.2, 29.3, 29.4, 29.5, 31.7, 52.7, 53.1, 54.4, 66.6, 95.3, 129.0, 131.4, 137.2, 138.7, 144.3, 155.2, 165.4, 168.6, 171.0, 178.4.

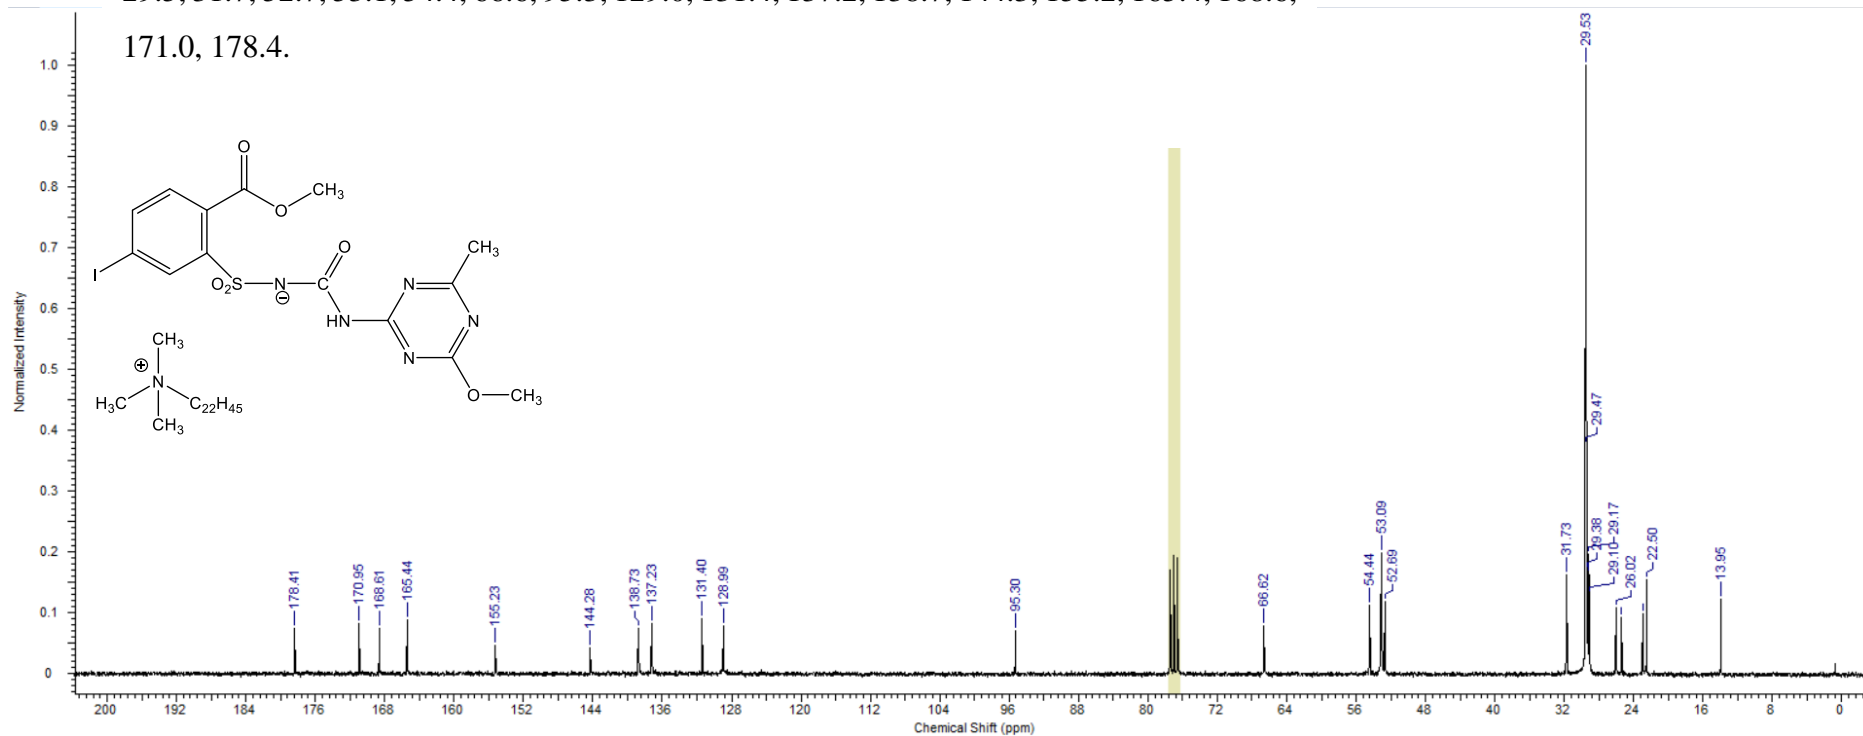

**Figure S21.** UV spectrum of dioctyldimethylammonium ((5-iodo-2-(methoxycarbonyl)phenyl)sulfonyl)((4-methoxy-6-methyl-1,3,5-triazin-2-yl)carbamoyl)amidate (**6**).

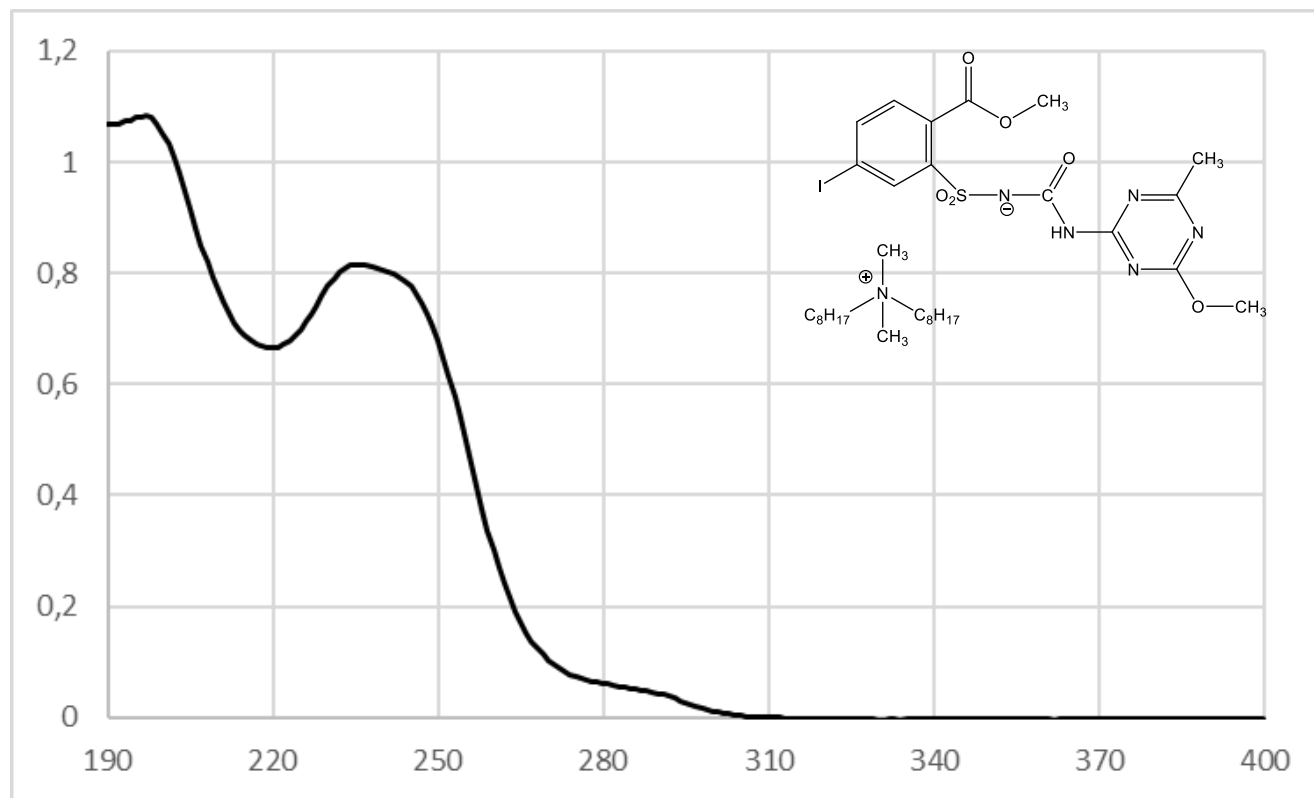

$$\lambda_{1max}(\text{water}) = 197 \text{ nm}; \lambda_{2max}(\text{water}) = 235 \text{ nm}$$

$$\varepsilon_{\lambda_{1max}} = 2.98 \cdot 10^4 \text{ dm}^3 \text{ mol}^{-1} \text{ cm}^{-1}; \varepsilon_{\lambda_{2max}} = 2.24 \cdot 10^4 \text{ dm}^3 \text{ mol}^{-1} \text{ cm}^{-1}$$

$$\varepsilon_{\lambda_{1max}} / \varepsilon_{\lambda_{2max}} = 1.33$$

**Figure S22.** FT-IR spectrum of dioctyldimethylammonium ((5-iodo-2-(methoxycarbonyl)phenyl)sulfonyl)((4-methoxy-6-methyl-1,3,5-triazin-2-yl)carbamoyl)amidate (**6**).

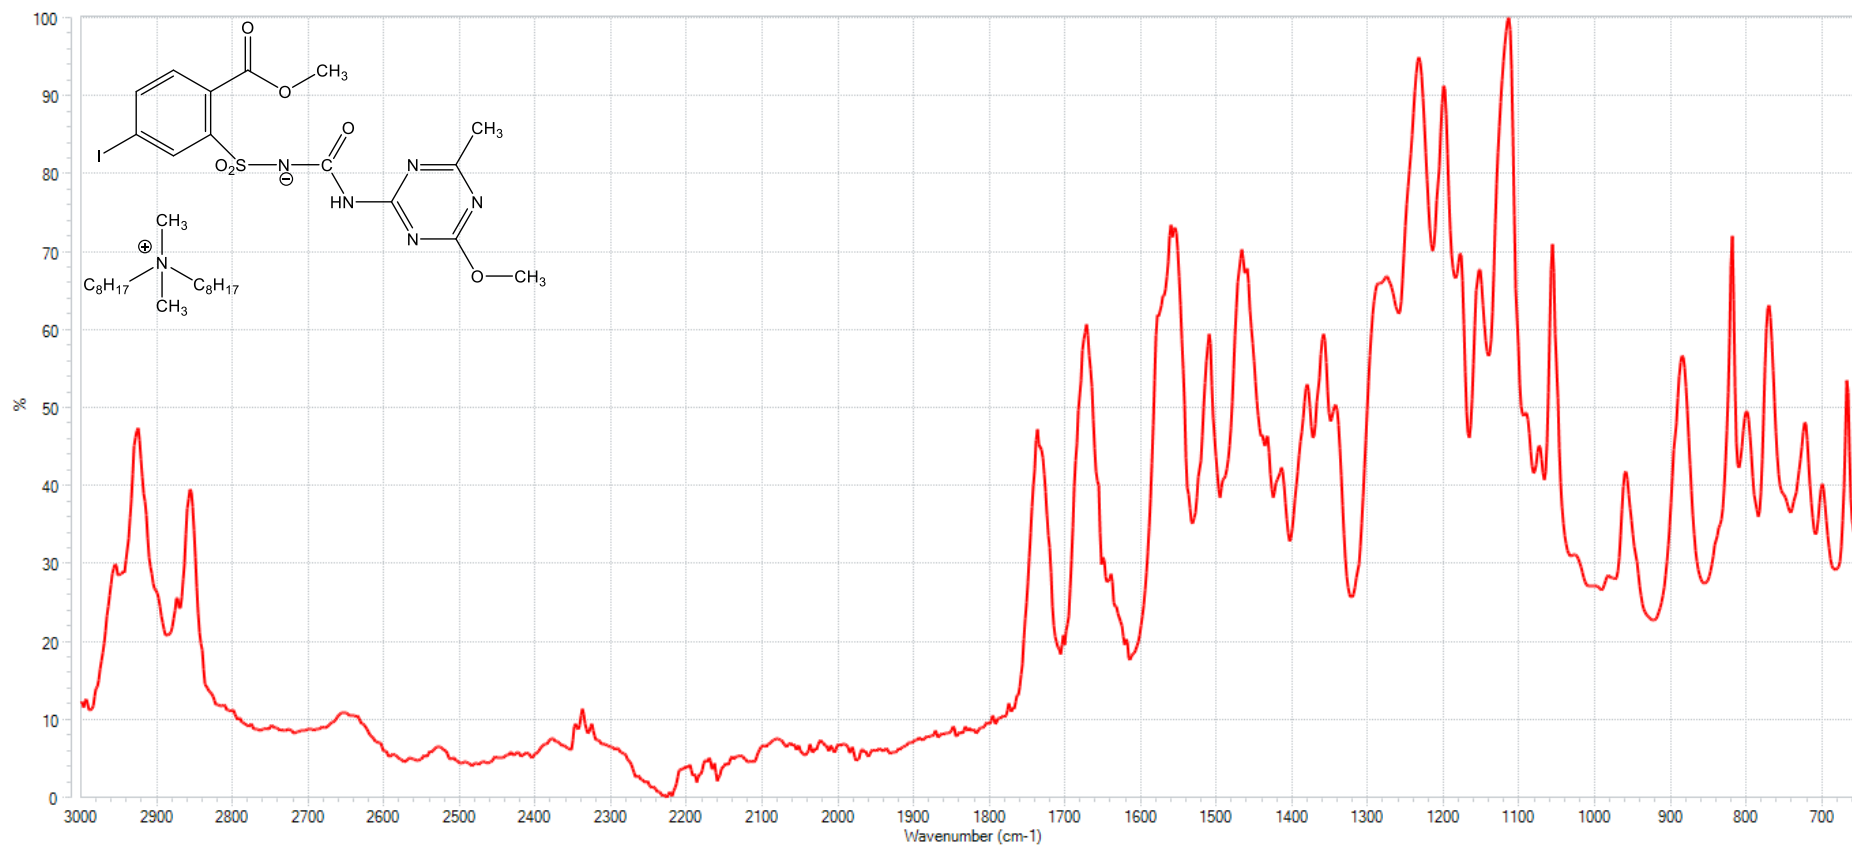

IR  $\nu_{\max}$  [cm<sup>-1</sup>] = 2924, 2854, 1735, 1672, 1578, 1560, 1509, 1468, 1431, 1359, 1343, 1274, 1233, 1200, 1113, 1056, 886, 819, 770.



**Figure S23.**  $^1\text{H}$  NMR spectrum of dioctyldimethylammonium ((5-iodo-2-(methoxycarbonyl)phenyl)sulfonyl)((4-methoxy-6-methyl-1,3,5-triazin-2-yl)carbamoyl)amidate (**6**).

$^1\text{H}$  NMR (400 MHz,  $\text{CDCl}_3$ )  $\delta$  [ppm] = 0.88 (t,  $J$  = 7.1 Hz, 6H), 1.25 (m, 20H), 1.61 (m, 4H), 2.40 (s, 3H), 3.13 (s, 6H), 3.25 (m, 4H), 3.87 (s, 3H), 3.92 (s, 3H), 7.10 (d,  $J$  = 8.0 Hz, 1H), 7.70 (s, 1H), 7.73 (dd,  $J$  = 8.0 Hz; 1.7 Hz, 1H), 8.42 (d,  $J$  = 1.7 Hz, 1H).

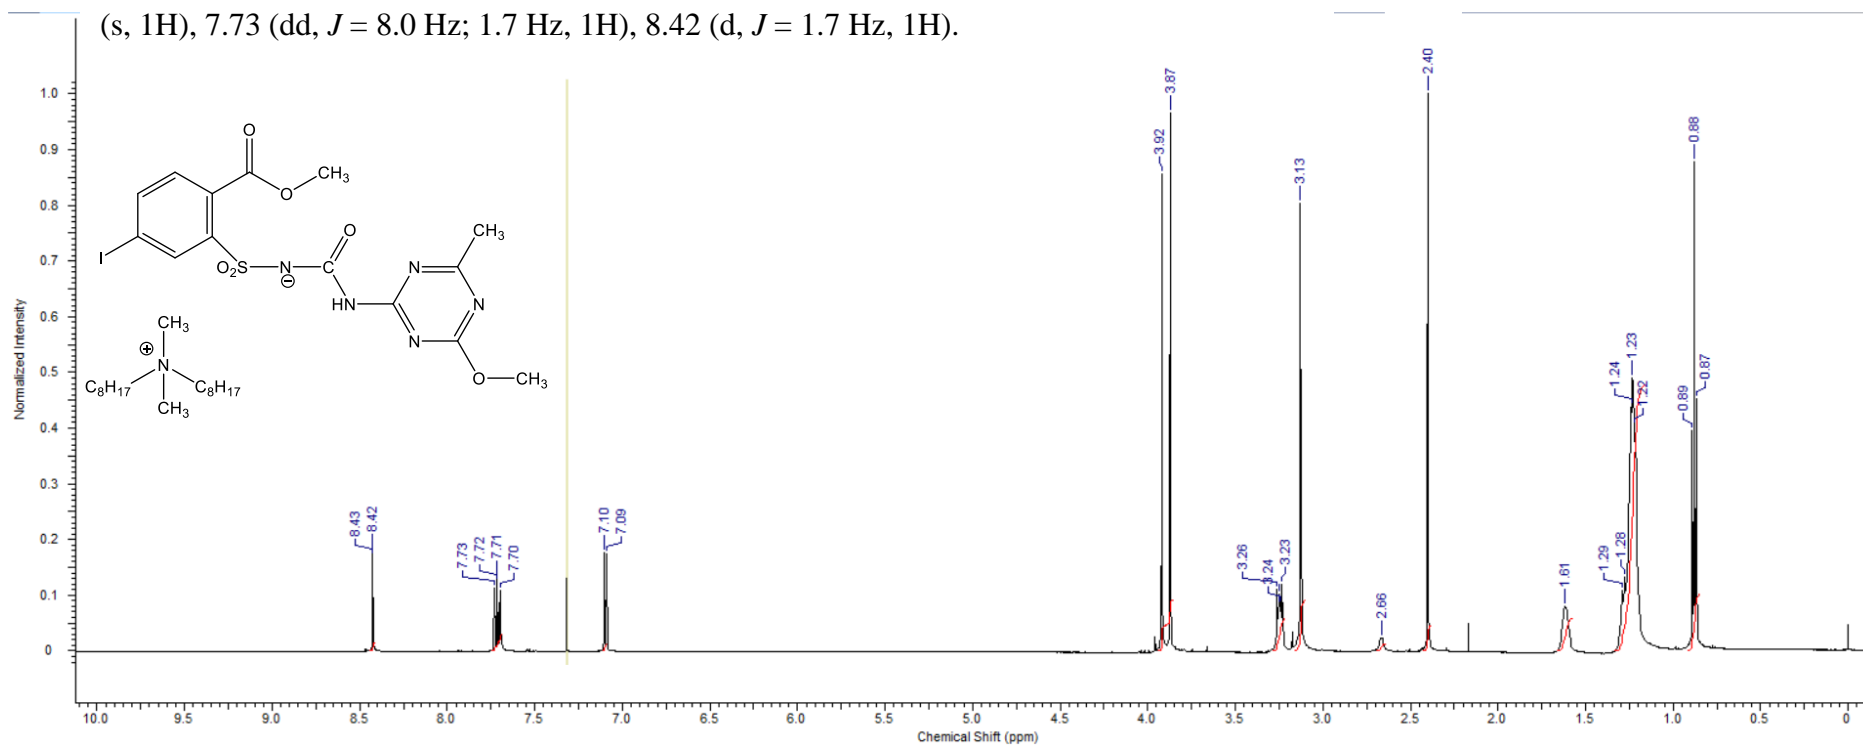

**Figure S24.**  $^{13}\text{C}$  NMR spectrum of dioctyldimethylammonium ((5-iodo-2-(methoxycarbonyl)phenyl)sulfonyl)((4-methoxy-6-methyl-1,3,5-triazin-2-yl)carbamoyl)amidate (**6**).

$^{13}\text{C}$  NMR (100 MHz,  $\text{CDCl}_3$ )  $\delta$  [ppm] = 13.9, 22.5 (2), 25.4, 26.1, 29.0, 29.1, 29.3 (2), 31.7, 50.9, 52.7, 54.4, 63.8, 95.3, 128.9, 131.5, 137.4, 138.6, 144.5, 155.1, 165.5, 168.7, 171.0, 178.4.

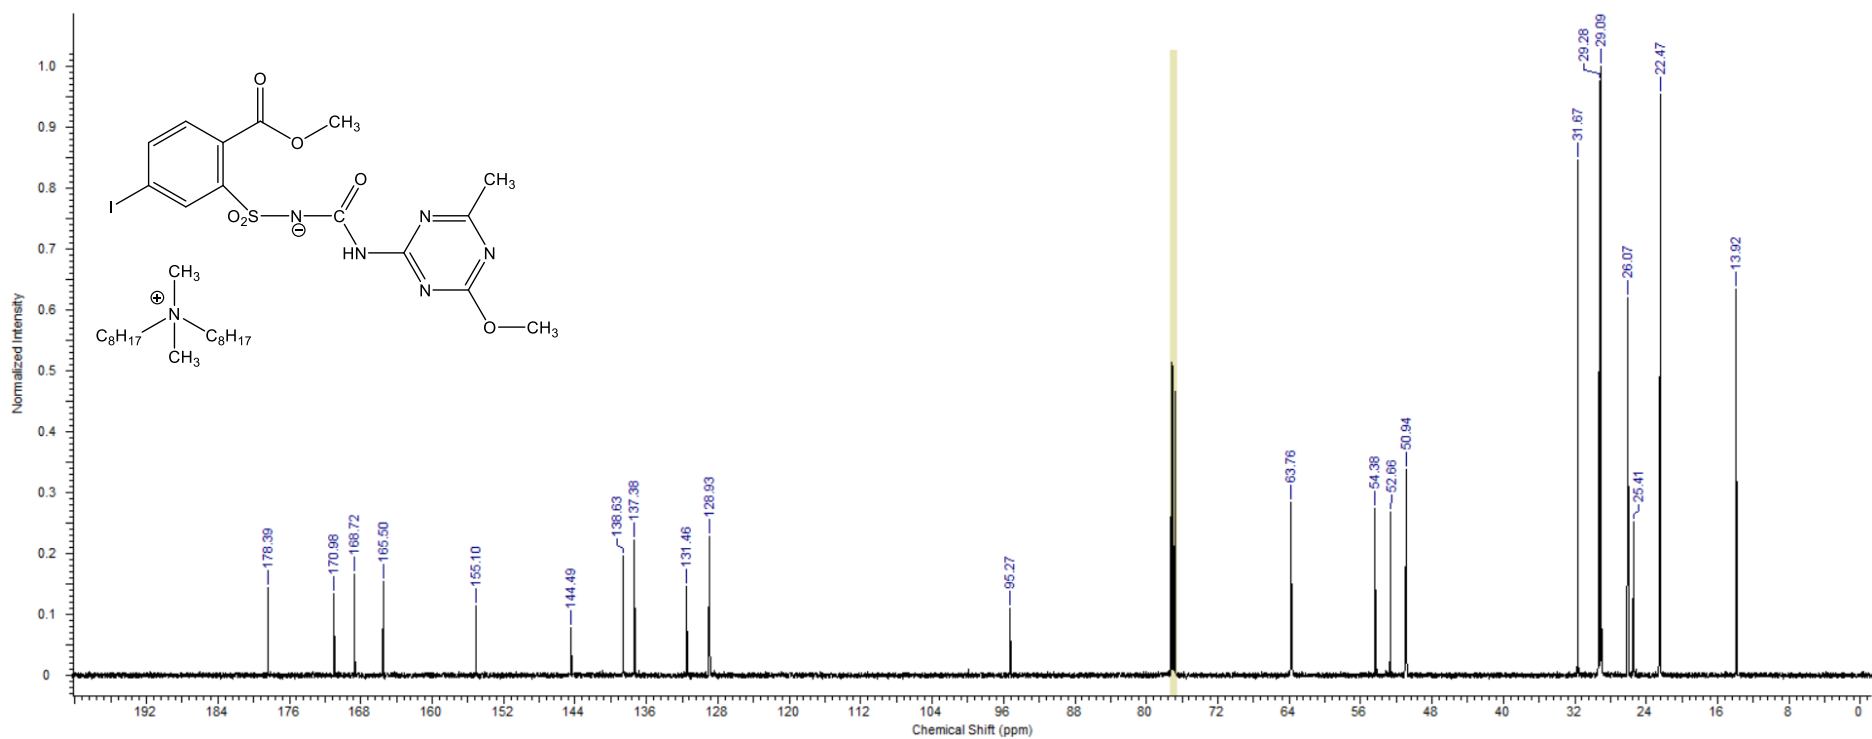

**Figure S25.** UV spectrum of didecyldimethylammonium ((5-iodo-2-(methoxycarbonyl)phenyl)sulfonyl)((4-methoxy-6-methyl-1,3,5-triazin-2-yl)carbamoyl)amidate (7).

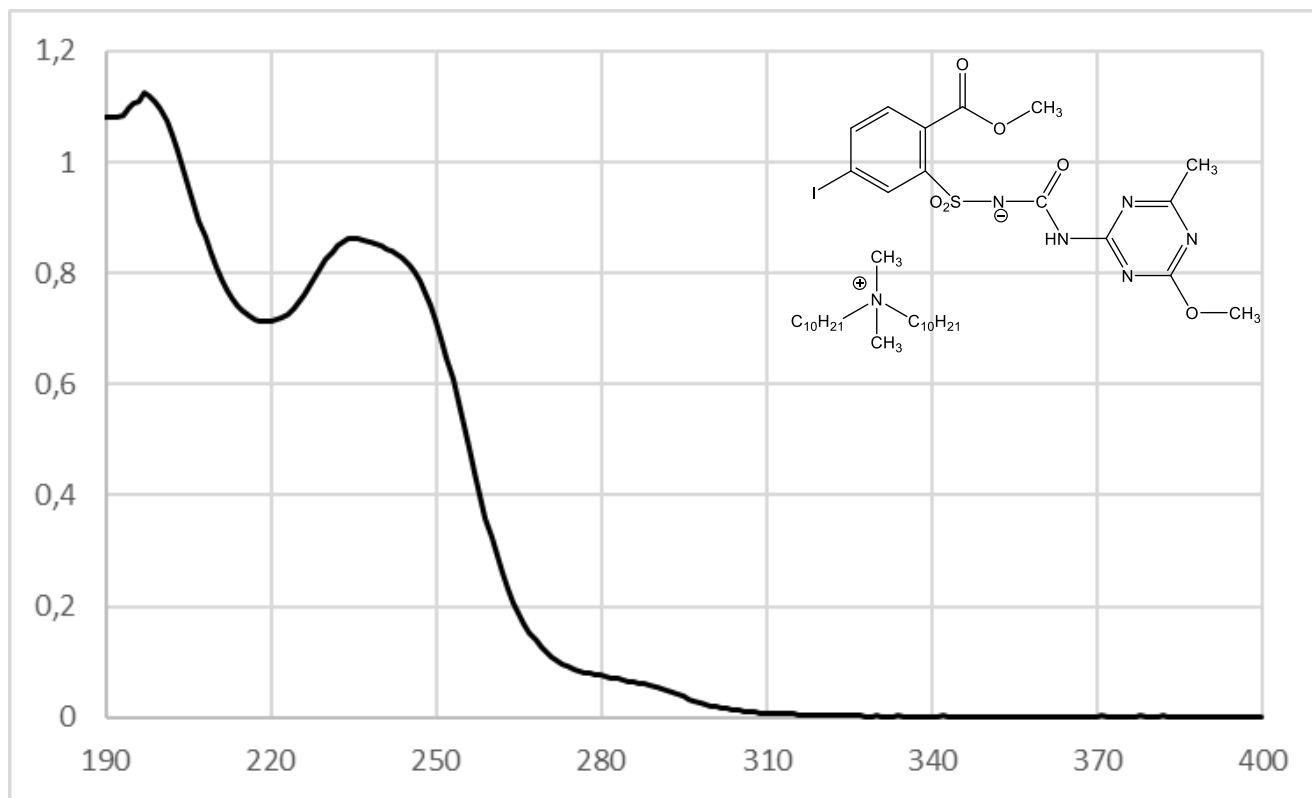

$$\lambda_{1\max}(\text{water}) = 197 \text{ nm}; \lambda_{2\max}(\text{water}) = 235 \text{ nm}$$

$$\varepsilon_{\lambda 1\max} = 3.33 \cdot 10^4 \text{ dm}^3 \text{ mol}^{-1} \text{ cm}^{-1}; \varepsilon_{\lambda 2\max} = 2.55 \cdot 10^4 \text{ dm}^3 \text{ mol}^{-1} \text{ cm}^{-1}$$

$$\varepsilon_{\lambda 1\max} / \varepsilon_{\lambda 2\max} = 1.30$$

**Figure S26.** FT-IR spectrum of didecyldimethylammonium ((5-iodo-2-(methoxycarbonyl)phenyl)sulfonyl)((4-methoxy-6-methyl-1,3,5-triazin-2-yl)carbamoyl)amidate (7).

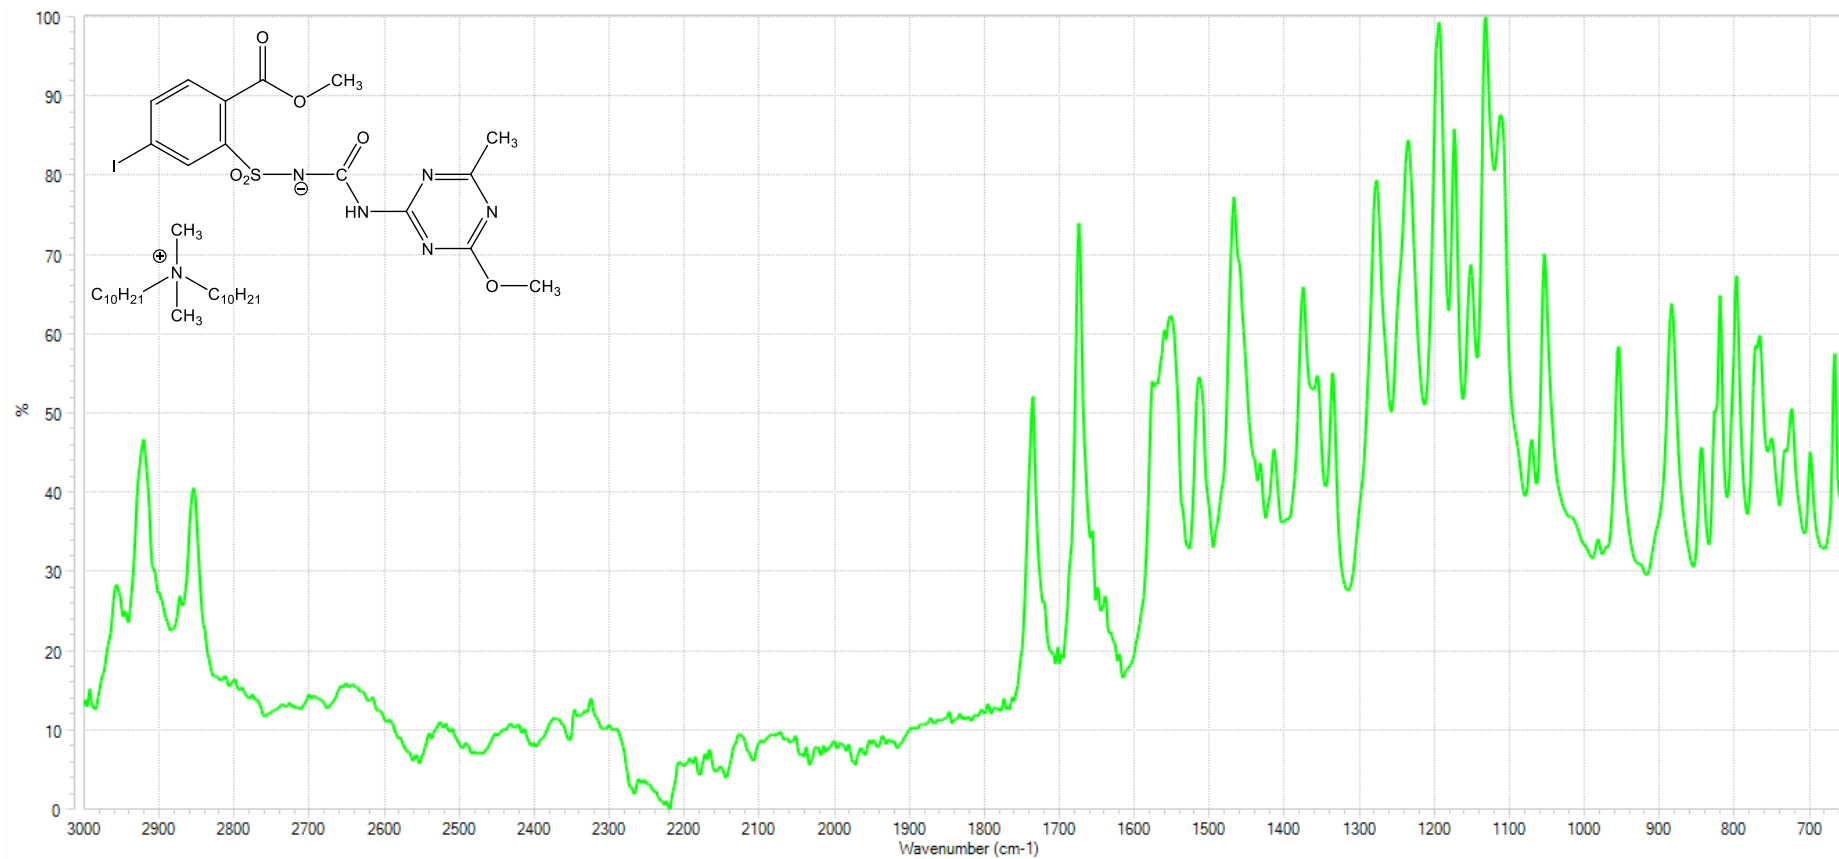

IR  $\nu_{\text{max}}$  [cm<sup>-1</sup>] = 2921, 2854, 1735, 1674, 1656, 1561, 1514, 1467, 1431, 1357, 1337, 1278, 1235, 1195, 1110, 1053, 883, 818, 772.

**Figure S27.**  $^1\text{H}$  NMR spectrum of didecyldimethylammonium ((5-iodo-2-(methoxycarbonyl)phenyl)sulfonyl)((4-methoxy-6-methyl-1,3,5-triazin-2-yl)carbamoyl)amidate (**7**).

$^1\text{H}$  NMR (400 MHz,  $\text{CDCl}_3$ )  $\delta$  [ppm] = 0.91 (m, 6H), 1.30 (m, 28H), 1.66 (m, 4H), 2.35 (s, 3H), 3.03 (s, 6H), 3.27 (m, 4H), 3.79 (s, 3H), 3.90 (s, 3H), 7.21 (d,  $J = 8.0$  Hz, 1H), 7.73 (d,  $J = 7.9$  Hz, 1H), 8.35 (d,  $J = 1.7$  Hz, 1H).

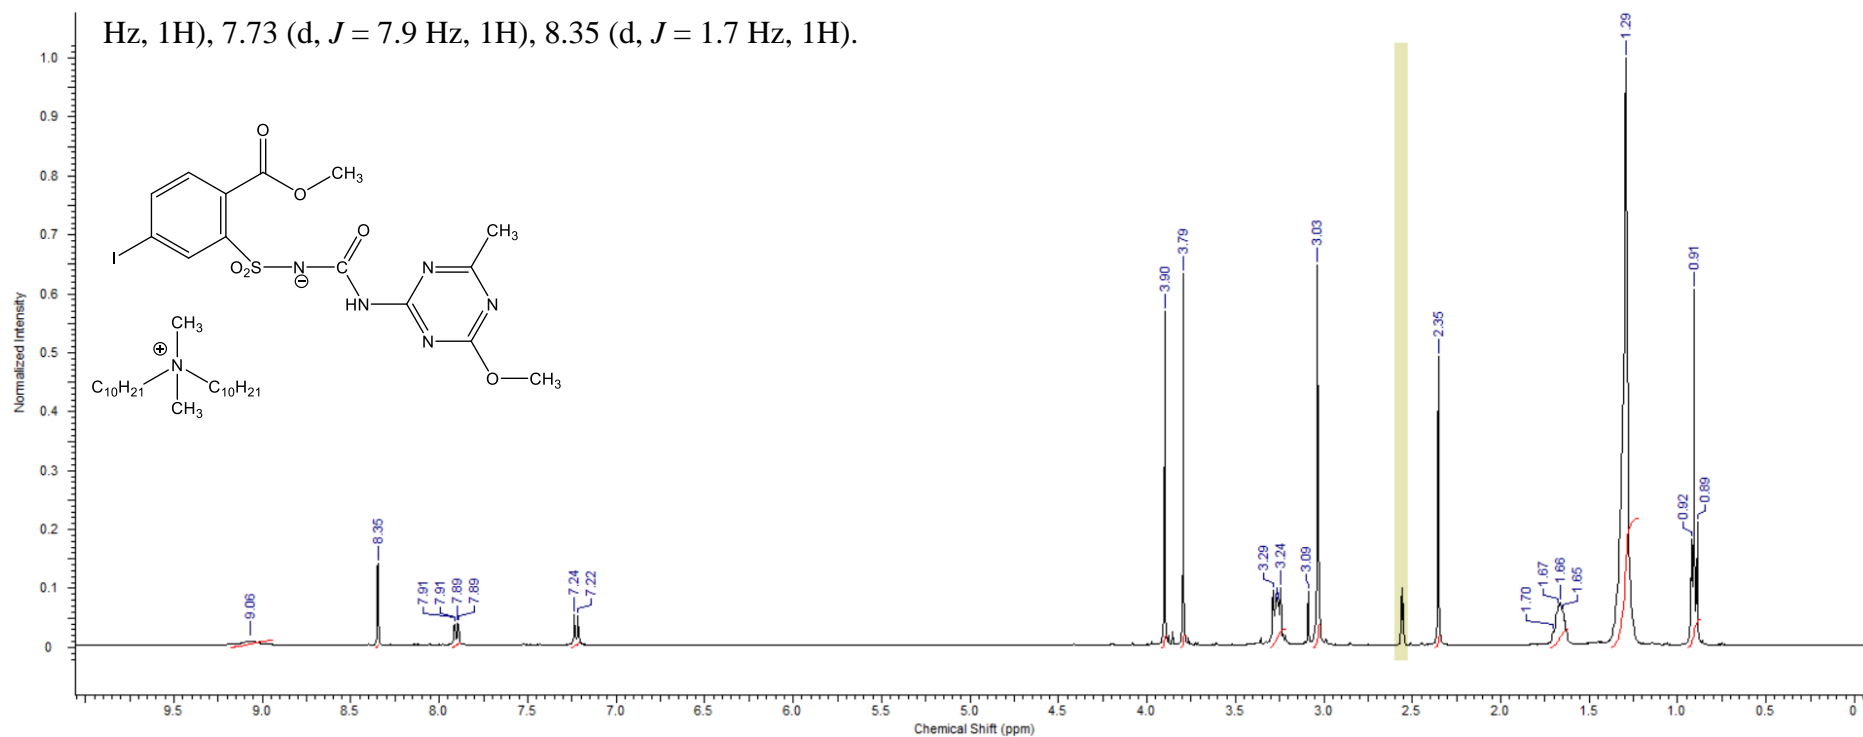

**Figure S28.**  $^{13}\text{C}$  NMR spectrum of didecyltrimethylammonium ((5-iodo-2-(methoxycarbonyl)phenyl)sulfonyl)((4-methoxy-6-methyl-1,3,5-triazin-2-yl)carbamoyl)amidate (7).

$^{13}\text{C}$  NMR (100 MHz,  $\text{DMSO}-d_6$ )  $\delta$  [ppm] = 13.9, 21.7, 22.1, 25.1, 25.7, 28.5, 28.7, 28.7, 28.9, 31.3, 49.9, 52.4, 54.1, 62.8, 95.6, 129.0, 131.2, 137.3, 138.3, 144.8, 154.6, 165.5, 165.6, 168.1, 170.6, 177.4.

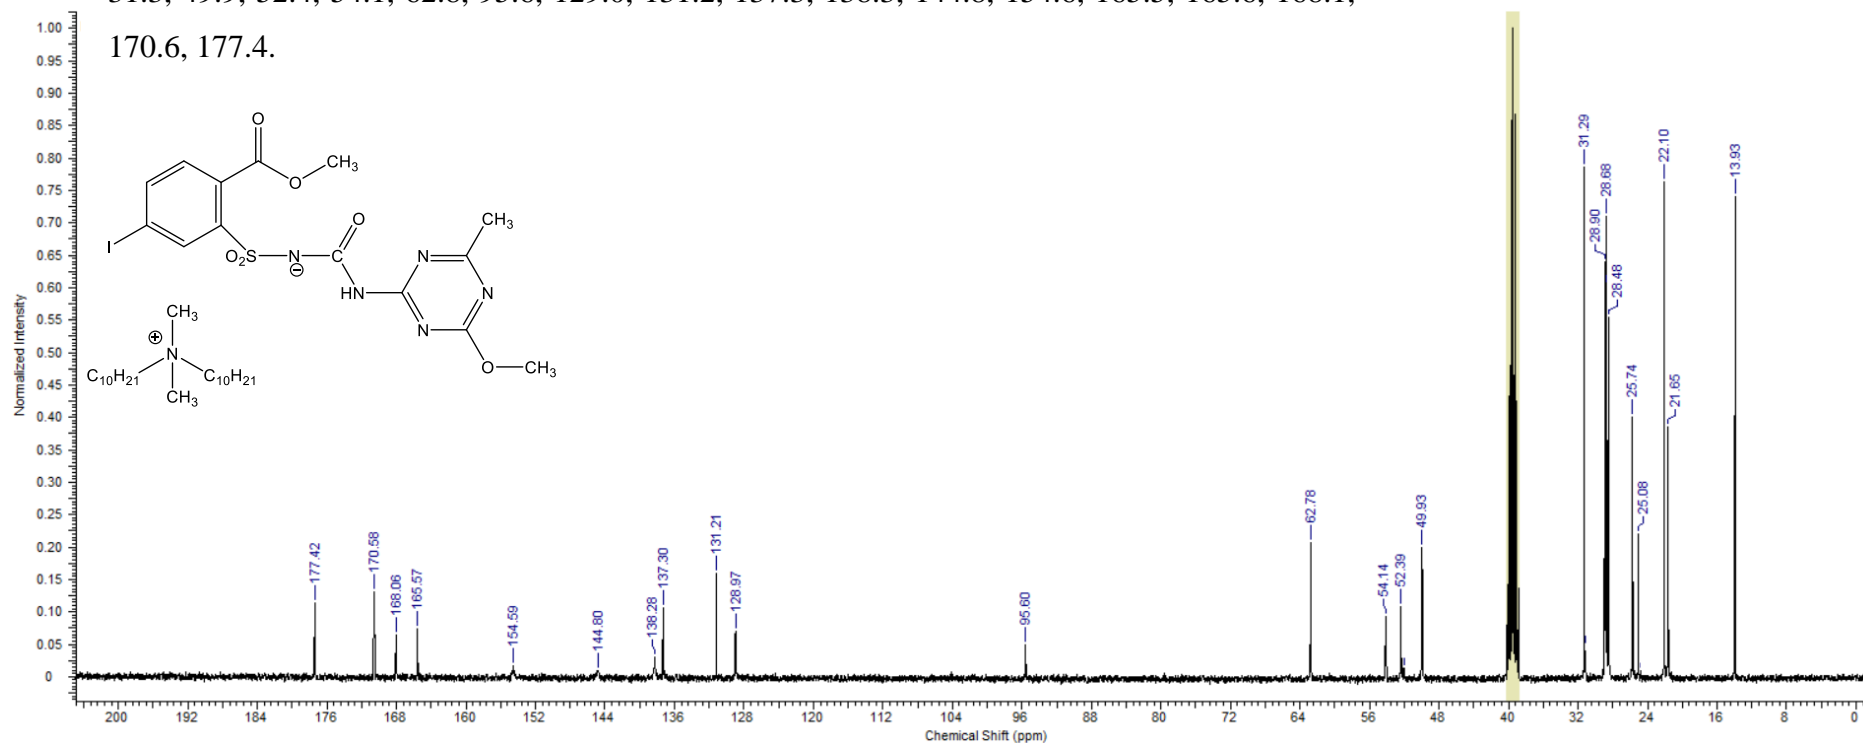

**Figure S29.** UV spectrum of di(hydrogenated tallow)dimethylammonium ((5-iodo-2-(methoxycarbonyl)phenyl)sulfonyl)((4-methoxy-6-methyl-1,3,5-triazin-2-yl)carbamoyl)amidate (**8**).

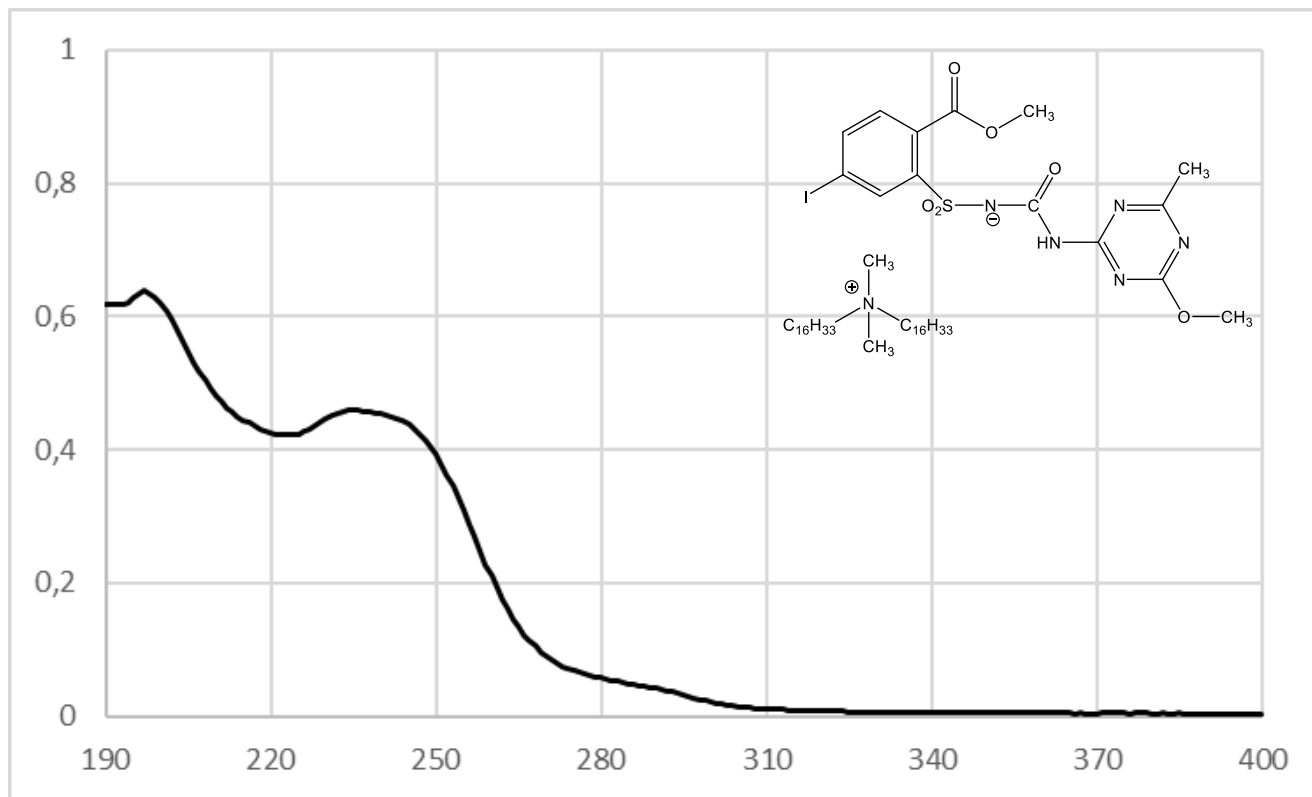

$$\lambda_{1\max}(\text{water}) = 197 \text{ nm}; \lambda_{2\max}(\text{water}) = 235 \text{ nm}$$

$$\varepsilon_{\lambda_{1\max}} = 3.21 \cdot 10^4 \text{ dm}^3 \text{ mol}^{-1} \text{ cm}^{-1}; \varepsilon_{\lambda_{2\max}} = 2.31 \cdot 10^4 \text{ dm}^3 \text{ mol}^{-1} \text{ cm}^{-1}$$

$$\varepsilon_{\lambda_{1\max}} / \varepsilon_{\lambda_{2\max}} = 1.39$$

**Figure S30.** FT-IR spectrum of di(hydrogenated tallow)dimethylammonium ((5-iodo-2-(methoxycarbonyl)phenyl)sulfonyl)((4-methoxy-6-methyl-1,3,5-triazin-2-yl)carbamoyl)amidate (**8**).

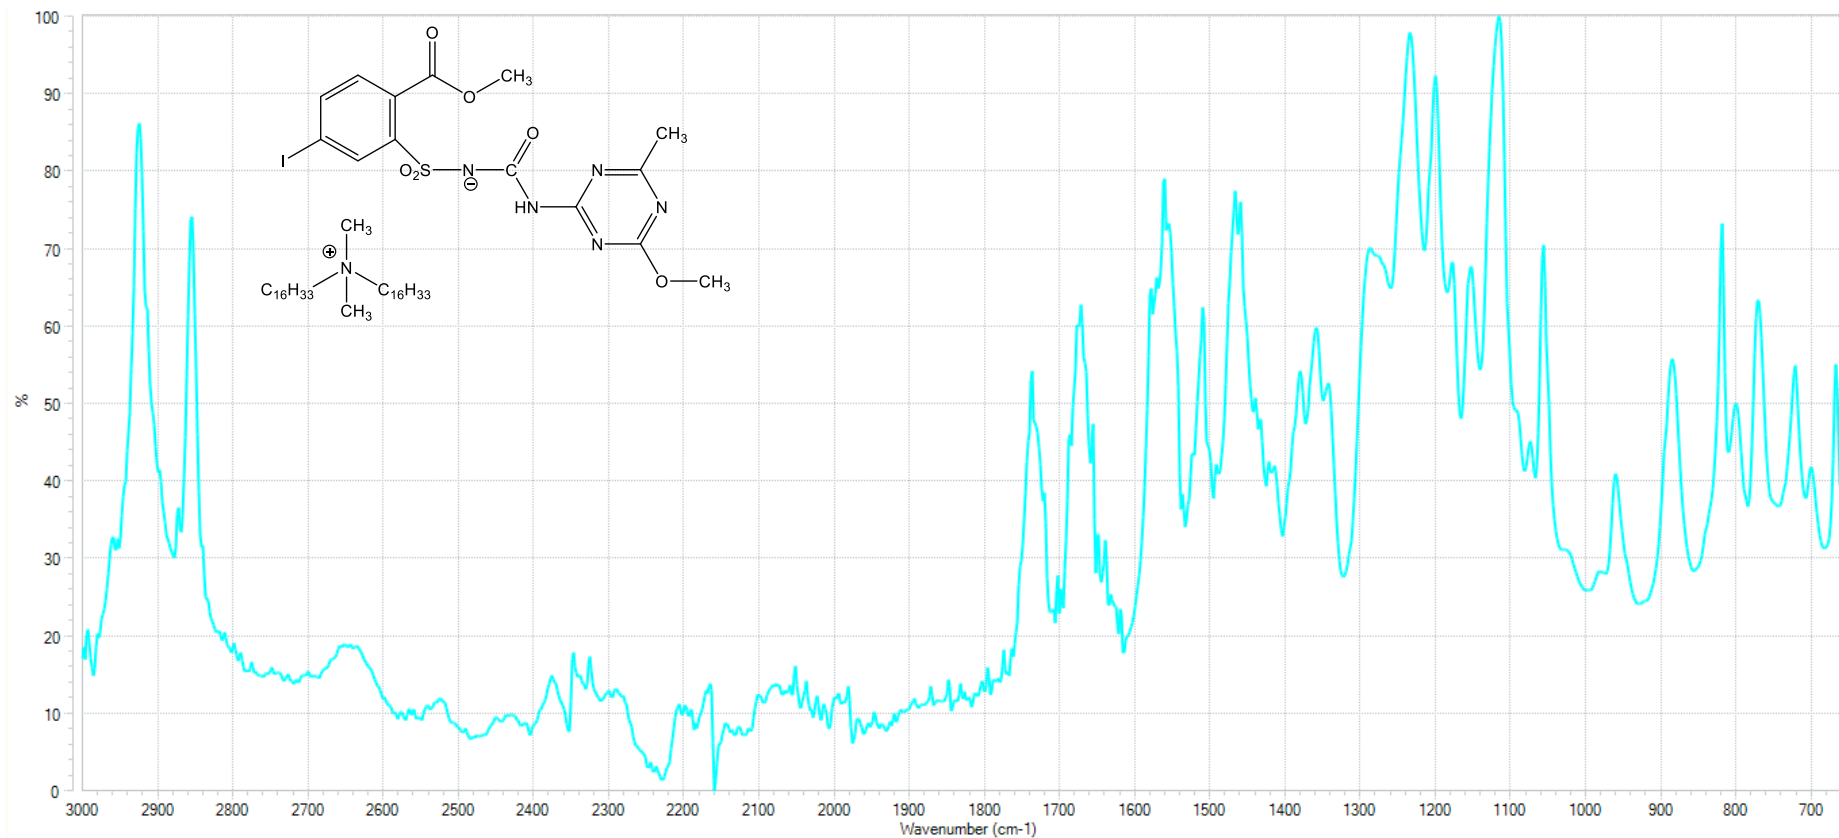

IR  $\nu_{\text{max}}$  [ $\text{cm}^{-1}$ ] = 2924, 2856, 1735, 1672, 1656, 1561, 1510, 1467, 1431, 1359, 1343, 1289, 1235, 1200, 1116, 1054, 885, 818, 770.



**Figure S31.**  $^1\text{H}$  NMR spectrum of di(hydrogenated tallow)dimethylammonium ((5-iodo-2-(methoxycarbonyl)phenyl)sulfonyl)((4-methoxy-6-methyl-1,3,5-triazin-2-yl)carbamoyl)amidate (**8**).

$^1\text{H}$  NMR (300 MHz,  $\text{CDCl}_3$ )  $\delta$  [ppm] = 0.88 (m, 6H), 1.26 (m, 52H), 1.61 (m, 4H), 2.40 (s, 3H), 3.13 (s, 6H), 3.24 (m, 4H), 3.87 (s, 3H), 3.91 (s, 3H), 7.10 (d,  $J$  = 8.0 Hz, 1H), 7.70 (d,  $J$  = 1.7 Hz, 1H), 7.73 (d,  $J$  = 1.7 Hz, 1H), 8.42 (d,  $J$  = 1.7 Hz, 1H).

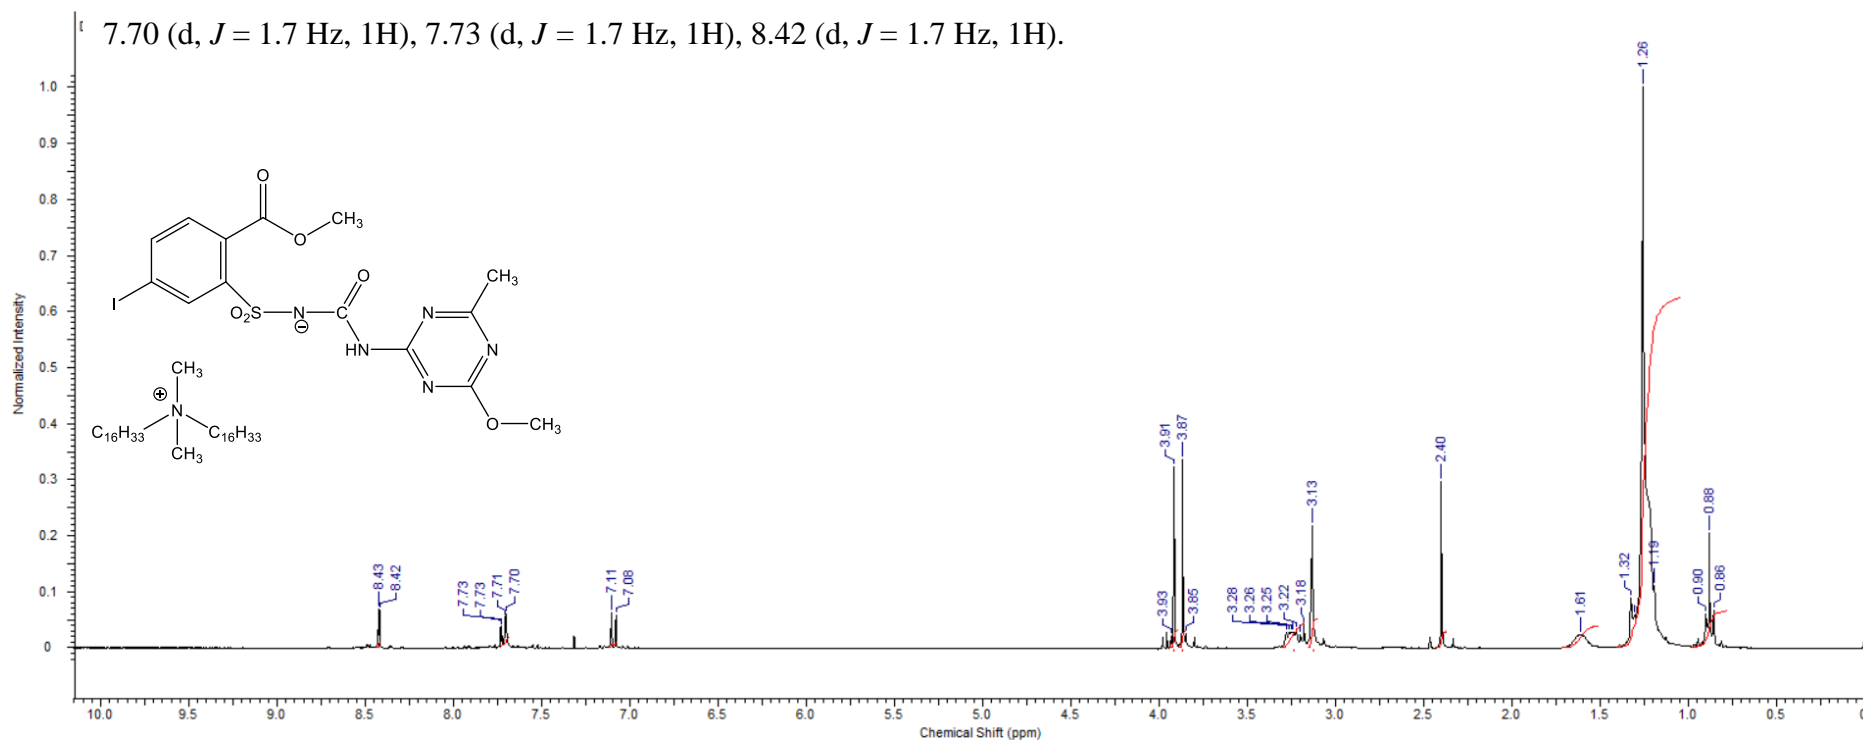

**Figure S32.**  $^{13}\text{C}$  NMR spectrum of di(hydrogenated tallow)dimethylammonium ((5-iodo-2-(methoxycarbonyl)phenyl)sulfonyl)((4-methoxy-6-methyl-1,3,5-triazin-2-yl)carbamoyl)amidate (**8**).

$^{13}\text{C}$  NMR (75 MHz,  $\text{CDCl}_3$ )  $\delta$  [ppm] = 13.9, 22.5, 25.4, 26.1, 29.0, 29.1, 29.2, 29.3, 29.4, 29.5 (2), 31.8, 50.9, 52.6, 54.4, 63.7, 95.3, 128.9, 131.5, 137.4, 138.6, 144.5, 155.1, 165.5, 168.7, 171.0, 178.4.

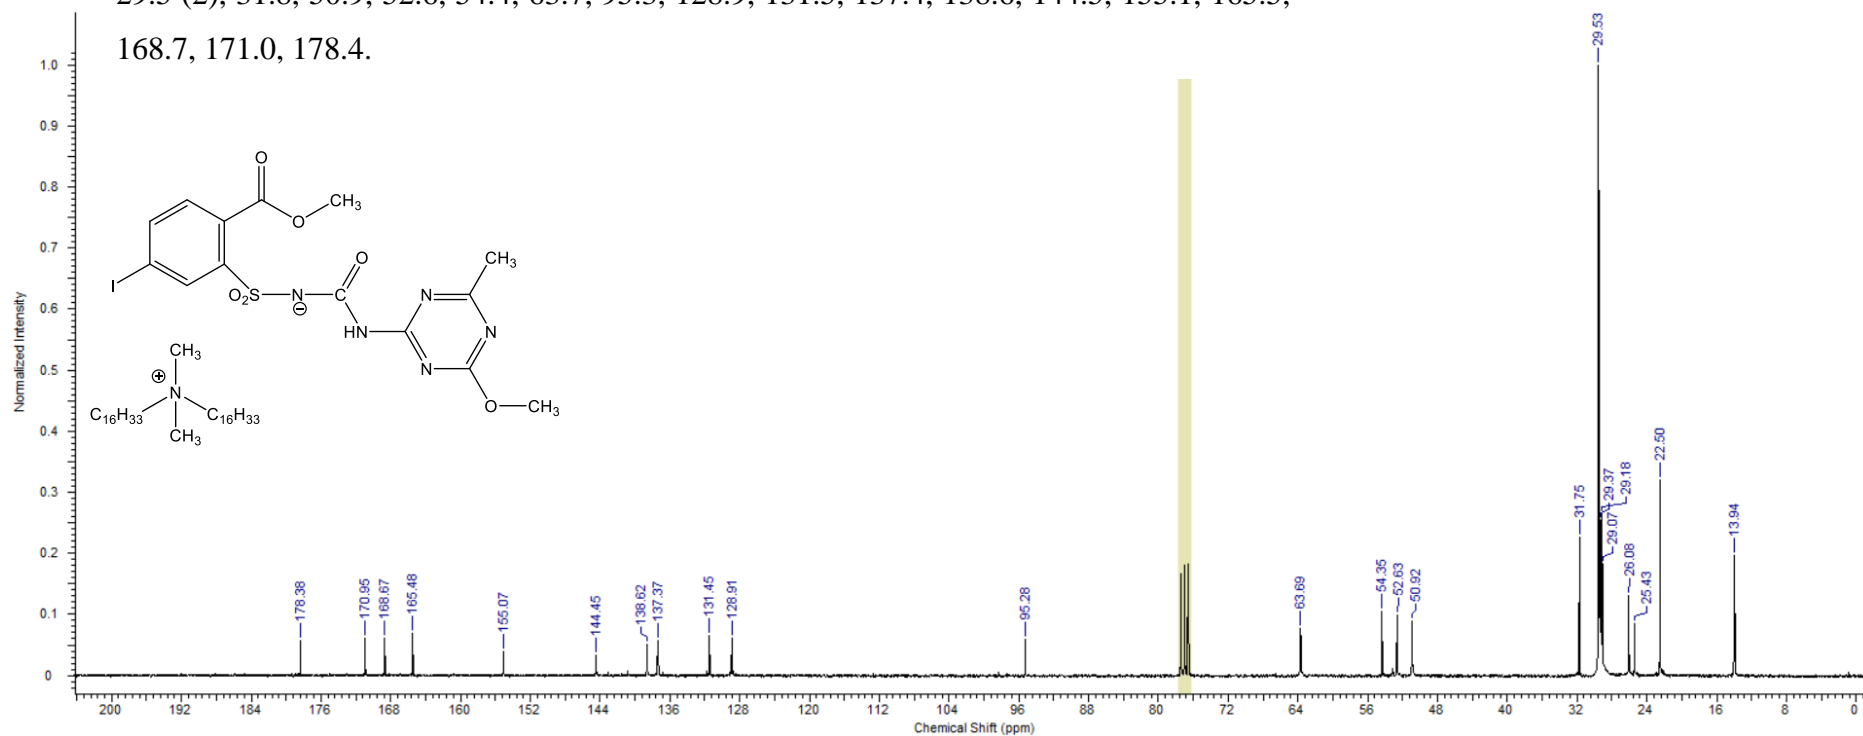

**Figure S33.** The FT-IR spectra of product with mirystyltrimethylammonium cation (**2**) with numbering of the most characteristic vibrations

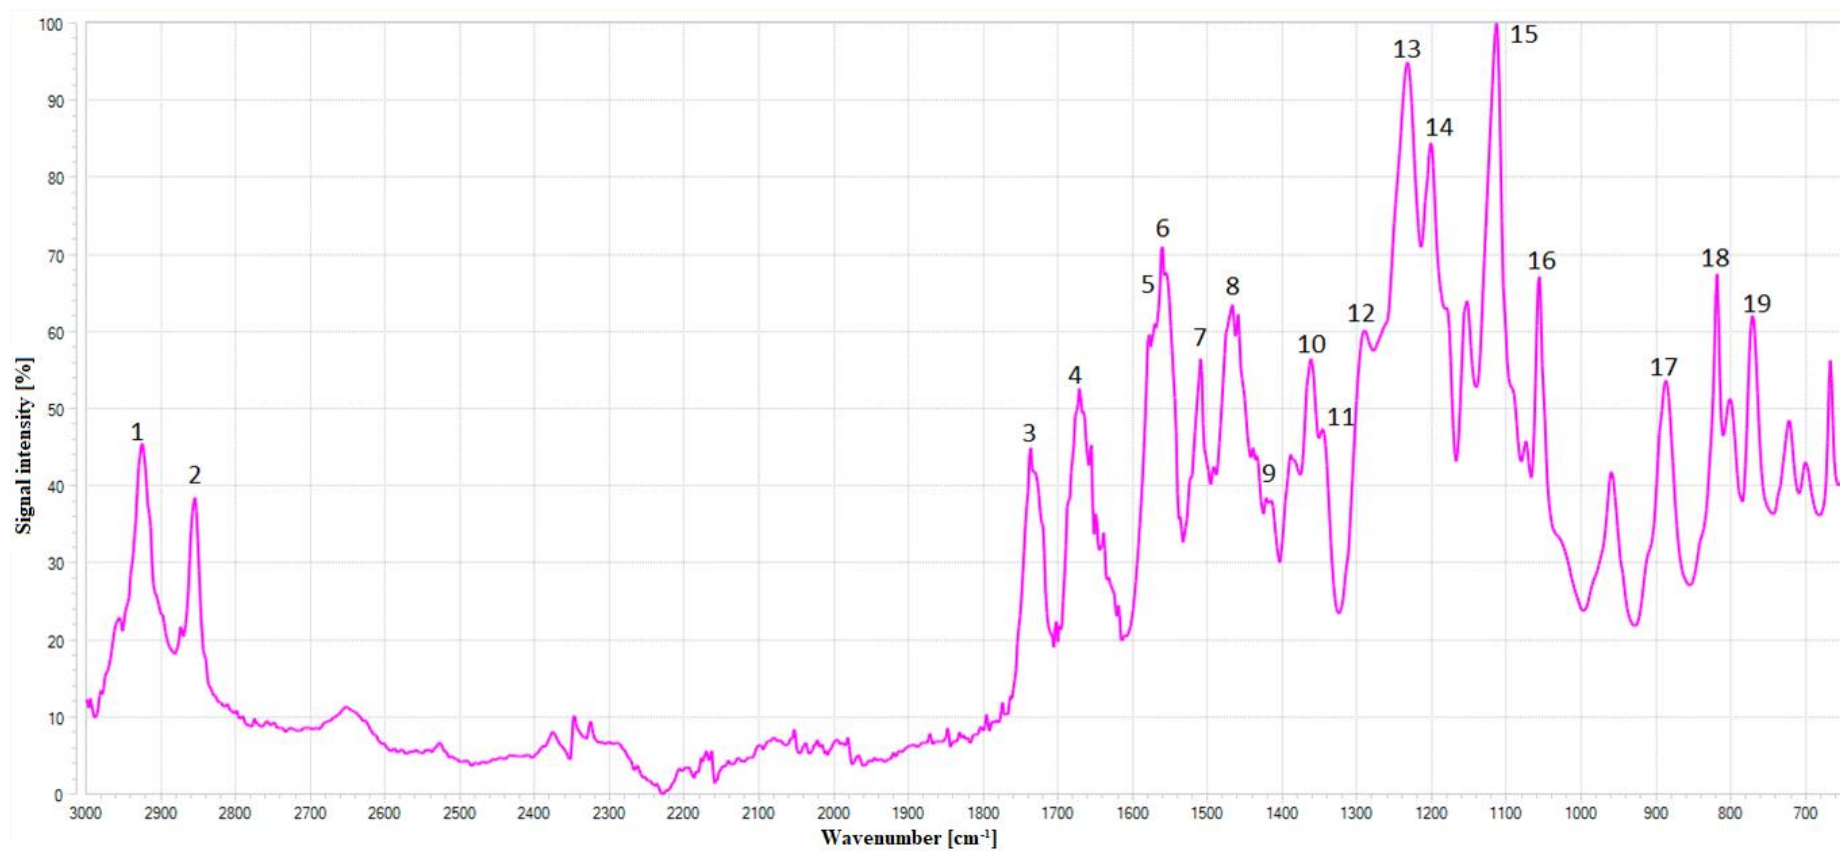

**Figure S34.** The comparison between FT-IR spectra of ILs comprising alkyltrimethylammonium cation (**1-5**) compared to iodosulfuron-methyl sodium salt [**Na**][**ISM**].

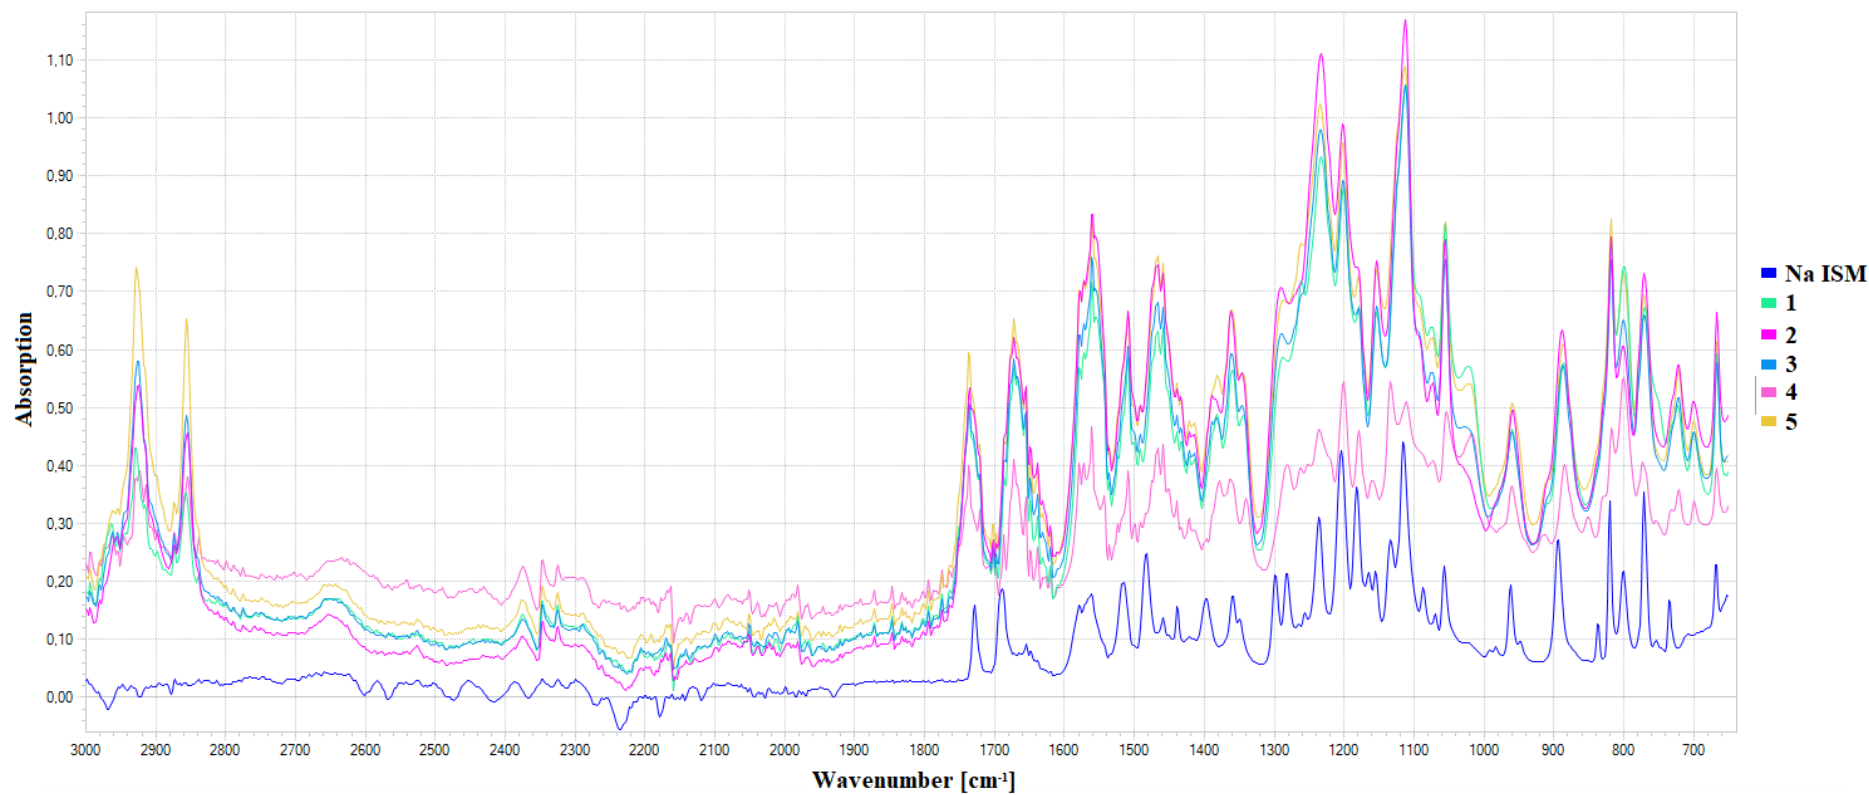

**Figure S35.** The comparison between FT-IR spectra of products with dialkyldimethylammonium cation (6-8) compared to iodosulfuron-methyl sodium salt [Na][ISM].

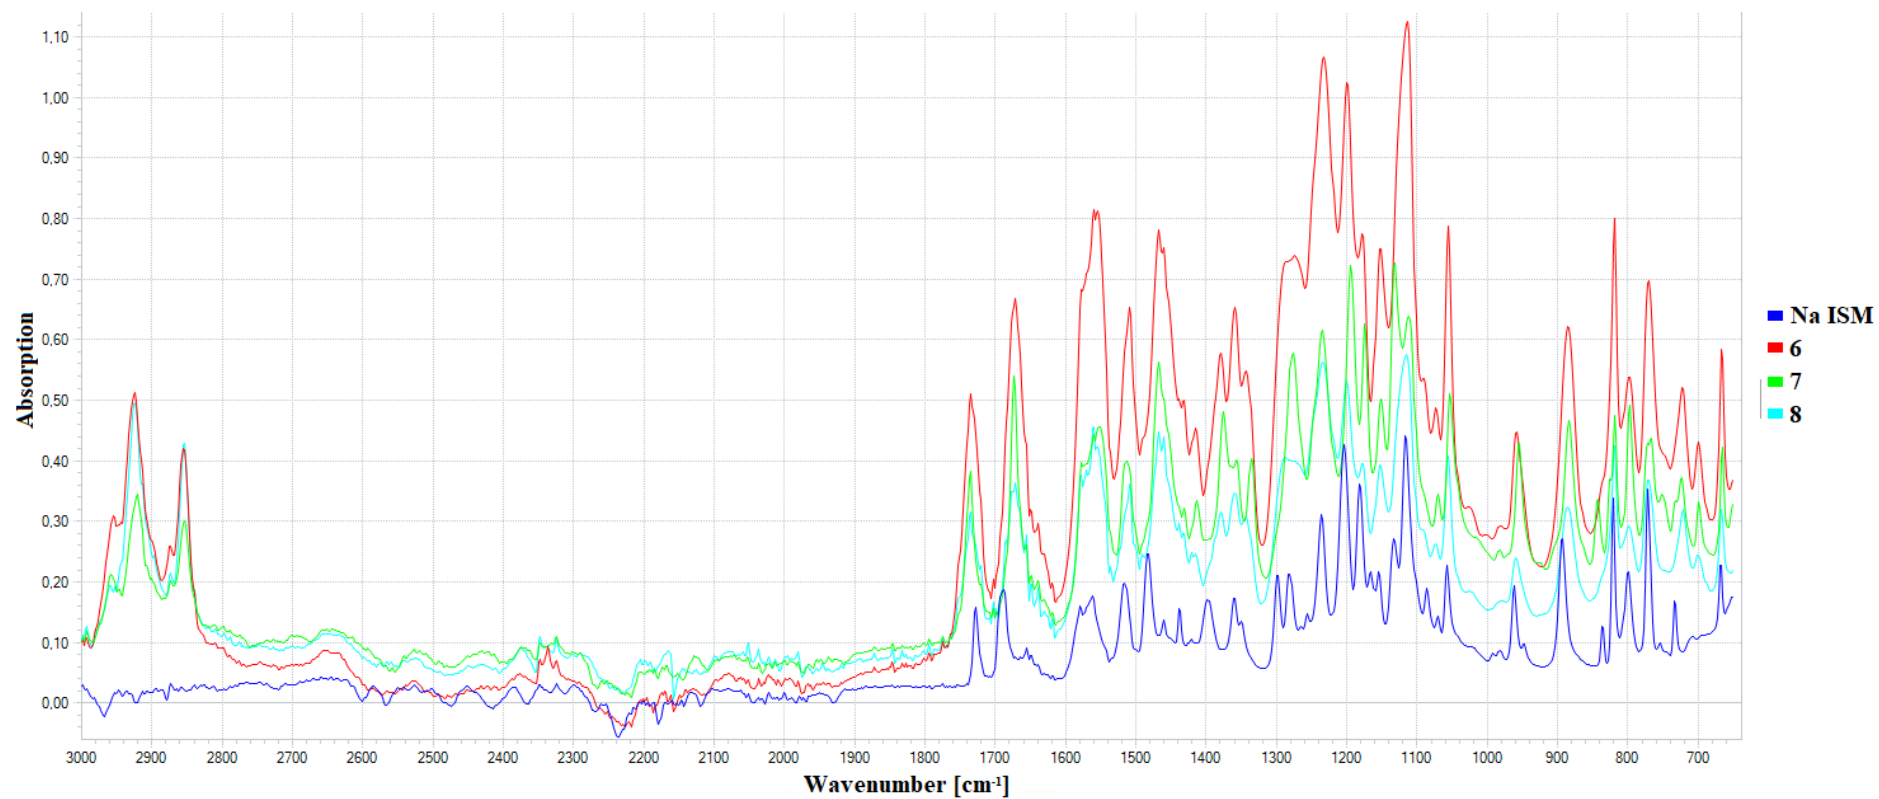

**Table S1.** The interaction energies of the cation with the anion in the substrates and obtained ILs.

| Substrate                                    | E <sub>w</sub><br>[kcal mol <sup>-1</sup> ] | Product - IL                                | E <sub>w</sub><br>[kcal mol <sup>-1</sup> ] |
|----------------------------------------------|---------------------------------------------|---------------------------------------------|---------------------------------------------|
| S1 (with C <sub>8</sub> alkyl) <sup>a</sup>  | 109.07                                      | 1 (with C <sub>8</sub> alkyl) <sup>a</sup>  | 81.37                                       |
| S1 (with C <sub>10</sub> alkyl) <sup>a</sup> | 109.07                                      | 1 (with C <sub>10</sub> alkyl) <sup>a</sup> | 81.35                                       |
| S1 (with C <sub>12</sub> alkyl) <sup>a</sup> | 108.48                                      | 1 (with C <sub>12</sub> alkyl) <sup>a</sup> | 81.35                                       |
| S2                                           | 89.87                                       | 2                                           | 81.97                                       |
| S3                                           | 109.07                                      | 3                                           | 81.88                                       |
| S4                                           | 108.05                                      | 4                                           | 80.79                                       |
| S5                                           | 105.14                                      | 5                                           | 82.30                                       |
| S6                                           | 107.55                                      | 6                                           | 81.48                                       |
| S7                                           | 107.58                                      | 7                                           | 81.70                                       |

<sup>a</sup> calculations were performed for compounds with only one defined alkyl substituent

**Table S2.** Analysis of FT-IR spectrum of the product with mirystyltrimethylammonium cation **2**

| No | Wavenumber [cm <sup>-1</sup> ] | Vibrations         | No | Wavenumber [cm <sup>-1</sup> ] | Vibrations                     |
|----|--------------------------------|--------------------|----|--------------------------------|--------------------------------|
| 1  | 2925                           | C-H $\gamma$ alif. | 11 | 1345                           | C-N $\gamma$ arom.             |
| 2  | 2855                           | C-H $\gamma$ alif. | 12 | 1290                           | C-O $\gamma$ ester             |
| 3  | 1736                           | C=O $\gamma$ ester | 13 | 1233                           | Ph-O-C $\gamma$ alif.          |
| 4  | 1679                           | C=O $\gamma$ amide | 14 | 1202                           | C-O-Ph $\gamma$ alif.          |
| 5  | 1562                           | N-H $\sigma$       | 15 | 1113                           | S=O $\gamma$ sym.              |
| 6  | 1562                           | C=C $\gamma$ arom  | 16 | 1055                           | C-H $\gamma$ arom in plane     |
| 7  | 1510                           | C=N $\gamma$ arom  | 17 | 887                            | C-H $\gamma$ arom.out of plane |
| 8  | 1467                           | C-H $\sigma$ alif. | 18 | 819                            | C-H $\gamma$ arom.out of plane |
| 9  | 1417                           | C-N $\gamma$ alif. | 19 | 773                            | C=C $\sigma$                   |
| 10 | 1388                           | S=O $\gamma$ asym  |    |                                |                                |

**Table S3.** Analysis of FT-IR spectra of all products compared to sodium salt of iodosulfuron-methyl [Na][ISM]

| No | Vibrations                     | Compound - wavenumber [cm <sup>-1</sup> ] |      |      |      |      |      |      |      | [Na][ISM] |
|----|--------------------------------|-------------------------------------------|------|------|------|------|------|------|------|-----------|
|    |                                | 1                                         | 2    | 3    | 4    | 5    | 6    | 7    | 8    |           |
| 1  | C-H $\gamma$ alif.             | 2930                                      | 2925 | 2927 | 2923 | 2928 | 2924 | 2921 | 2924 | ---       |
| 2  | C-H $\gamma$ alif.             | 2855                                      | 2855 | 2855 | 2853 | 2855 | 2854 | 2854 | 2856 | ---       |
| 3  | C=O $\gamma$ ester             | 1738                                      | 1736 | 1738 | 1738 | 1738 | 1735 | 1735 | 1735 | 1730      |
| 4  | C=O $\gamma$ amide             | 1672                                      | 1679 | 1672 | 1671 | 1671 | 1672 | 1674 | 1672 | 1692      |
| 5  | N-H $\sigma$                   | 1656                                      | 1655 | 1655 | 1655 | 1655 | 1656 | 1656 | 1656 | 1653      |
| 6  | C=C $\gamma$ arom              | 1563                                      | 1562 | 1563 | 1562 | 1562 | 1560 | 1561 | 1561 | 1562      |
| 7  | C=N $\gamma$ arom              | 1511                                      | 1510 | 1511 | 1510 | 1510 | 1509 | 1514 | 1510 | 1520      |
| 8  | C-H $\sigma$ alif.             | 1468                                      | 1467 | 1468 | 1467 | 1467 | 1468 | 1467 | 1467 | 1485      |
| 9  | C-N $\gamma$ alif.             | 1422                                      | 1417 | 1421 | 1421 | 1421 | 1431 | 1431 | 1431 | 1439      |
| 10 | S=O $\gamma$ asym              | 1361                                      | 1388 | 1362 | 1365 | 1362 | 1359 | 1357 | 1359 | 1362      |
| 11 | C-N $\gamma$ arom.             | 1343                                      | 1345 | 1346 | 1340 | 1344 | 1343 | 1337 | 1343 | 1347      |
| 12 | C-O $\gamma$ ester             | 1284                                      | 1290 | 1291 | 1281 | 1261 | 1274 | 1278 | 1289 | 1282      |
| 13 | Ph-O-C $\gamma$ alif.          | 1232                                      | 1233 | 1234 | 1236 | 1234 | 1233 | 1235 | 1235 | 1236      |
| 14 | C-O-Ph $\gamma$ alif.          | 1200                                      | 1202 | 1203 | 1200 | 1202 | 1200 | 1195 | 1200 | 1207      |
| 15 | S=O $\gamma$ sym.              | 1110                                      | 1113 | 1112 | 1111 | 1113 | 1113 | 1110 | 1116 | 1117      |
| 16 | C-H $\gamma$ arom in plane     | 1055                                      | 1055 | 1055 | 1054 | 1055 | 1056 | 1053 | 1054 | 1059      |
| 17 | C-H $\gamma$ arom.out of plane | 888                                       | 887  | 887  | 884  | 885  | 886  | 883  | 885  | 895       |
| 18 | C-H $\gamma$ arom.out of plane | 819                                       | 819  | 819  | 819  | 819  | 819  | 818  | 818  | 822       |
| 19 | C=C $\sigma$                   | 771                                       | 773  | 772  | 771  | 772  | 770  | 772  | 770  | 772       |

## Spectral analysis

Due to the presence of two aromatic rings, in a region of 190-400 nm all the products possessed two characteristic maxima ( $\lambda_{\text{max}}$ ) at approx. 200 (E2 band) and 235 nm (B band) in water (Figs. S1, S5, S9, S13, S17, S21, S25, S29). Similar  $\lambda_{\text{max}}$  were noted for triazine derivatives that are substituted with phenyl ring.[1] The calculated values of molar absorptivities ( $\epsilon_{\lambda_{\text{max}}}$ ) that occurred at the highest peak (235 nm) were in a range from  $2.24 \cdot 10^4 \text{ M}^{-1} \text{ cm}^{-1}$  for **6** to  $2.58 \cdot 10^4 \text{ M}^{-1} \text{ cm}^{-1}$  for **3**. These results are lower than those of the iodosulfuron-methyl sodium salt ( $\epsilon_{\lambda_{\text{max}}} = 2.91 \cdot 10^4 \text{ M}^{-1} \text{ cm}^{-1}$ ), which means that the presence of bulky organic cations led to reduction of this parameter. Additionally, the previous report describing UV spectrum of iodosulfuron-methyl sodium salt in methanol indicate that the solvent has insignificant impact on the location of absorption maximum as well as the molar absorptivity (in methanol:  $\lambda_{\text{max}} = 239 \text{ nm}$ ;  $\epsilon_{\lambda_{\text{max}}} = 2.91 \cdot 10^4 \text{ M}^{-1} \text{ cm}^{-1}$ ).[2]

In the FT-IR spectra of ILs (Figs. S2, S6, S10, S14, S18, S22, S26, S30) we can distinguish strong peaks originating from the iodosulfuron-methyl anion as well as the cations. The analysis of the most characteristic signals for IL with mirystyltrimethylammonium cation (**2**) is provided in supporting information in Fig. S33 and Table S1. Analogously, the location of these peaks was listed for all products in Table S2 (ESI). The most essential signals can be attributed to stretching vibrations from the amide group ( $\text{C}=\text{O}_{\gamma \text{ amide}}$ ) at approx.  $1670 \text{ cm}^{-1}$  or the signal from the ester substituent ( $\text{C}=\text{O}_{\gamma \text{ ester}}$ ) at  $1740 \text{ cm}^{-1}$ . We can also observe other characteristic bands, originating from the conjugated stretching vibrations from aromatic ring ( $\text{C}=\text{C}_{\gamma \text{ arom}}$ ) at approx.  $1560 \text{ cm}^{-1}$  or stretching vibrations from triazine ring ( $\text{C}=\text{N}_{\gamma \text{ arom}}$ ) at about  $1510 \text{ cm}^{-1}$ . [3] Signals at  $1360\text{-}1380 \text{ cm}^{-1}$  are due to asymmetric vibrations of the sulfonamide group ( $\text{S}=\text{O}_{\gamma \text{ asym}}$ ), while  $\text{S}=\text{O}$  symmetrical stretching vibrations ( $\text{S}=\text{O}_{\gamma \text{ sym}}$ ) occurred at approx.  $1110 \text{ cm}^{-1}$ , which corresponds well with the available literature data.[4] Interestingly, the comparison of the FT-IR spectra of the products (comprising alkyltrimethylammonium cations (**1-5**) - Fig. S34, comprising dialkyldimethylammonium cations (**6-8**) - Fig. S35, ESI) revealed a successive growth of the intensity of the bands at  $2800\text{-}3000 \text{ cm}^{-1}$  in relation to  $\text{C}=\text{O}_{\gamma}$  vibrations ( $1650\text{-}1750 \text{ cm}^{-1}$ ) as the length of the alkyl substituents in cations is increased. This confirms the presence of organic tetraalkylammonium cation in the structures of the products.

The  $^1\text{H}$  NMR analysis (Figs. S3, S7, S11, S15, S19, S23, S27, S31) revealed that signals originating from iodosulfuron-methyl anion appeared as singlets at approx. 2.4 ppm (protons from the methyl group) and 3.9 ppm, protons from the methyl in the ether and ester groups). Three protons from the aromatic ring were noted as: doublet at approx. 7.1 ppm, multiplet at 7.7 ppm and singlet at 8.4 ppm, respectively. Interestingly, the mentioned multiplet at 7.7 ppm encompassed also signal from the proton of the amide group, however, it can be even invisible in the spectra of sulfonylureas in the case of utilization of polar protic solvents, like deuterated

methanol (CD<sub>3</sub>OD).[2] According to collected data, the signals from the long alkyls in utilized cations appeared at approx. 0.9 ppm (triplet), 1.3 ppm (multiplet), 1.6 ppm (multiplet) 3.2 ppm (multiplet), whereas peaks from the methyl groups attached to nitrogen atom occurred as singlet at approx. 3.2 ppm.

In the <sup>13</sup>C NMR spectra of the products (Figs. S4, S8, S12, S16, S20, S24, S28, S32) signals from triazine ring occurred at the greatest values (169-179 ppm), while from benzene ring in a range from 95 to 144 ppm (the lowest value can be attributed to carbon substituted with iodine atom). Other characteristic peaks were found at 165 and 155 ppm, which originate from carbons from ester and amide group, respectively. Due to the presence of long alkyl chains all the products possessed multiple signals in a region beneath 35 ppm. Carbons attached directly to positively charged nitrogen atom were noted at 53 (methyl groups) and 67 ppm (methylene group), accordingly.

#### Reference for spectral analysis:

1. Koopman, H. U.V. spectra of derivatives of 1,3,5-triazine. *Recl. des Trav. Chim. des Pays-Bas* **1961**, 80, 158–172, doi:10.1002/recl.19610800206.
2. Niemczak, M.; Sobiech, Ł.; Grzanka, M. Iodosulfuron-Methyl-Based Herbicidal Ionic Liquids Comprising Alkyl Betainate Cation as Novel Active Ingredients with Reduced Environmental Impact and Excellent Efficacy. *J. Agric. Food Chem.* **2020**, 68, 13661–13671, doi:10.1021/acs.jafc.0c05850.
3. Shurvell, H.F.; Faniran, J.A.; Dodsworth, H. The infrared spectrum of 2,4,6-triphenyl-d15-1,3,5-triazine. *Spectrochim. Acta Part A Mol. Spectrosc.* **1967**, 23, 1313–1318, doi:10.1016/0584-8539(67)80352-0.
4. Gowda, B.T.; Jyothi, K.; D'Souza, J.D. Infrared and NMR Spectra of Arylsulphonamides, 4-X-C<sub>6</sub>H<sub>4</sub>SO<sub>2</sub>NH<sub>2</sub> and i-X, j-YC<sub>6</sub>H<sub>3</sub>SO<sub>2</sub>NH<sub>2</sub> (X=H; CH<sub>3</sub>; C<sub>2</sub>H<sub>5</sub>; F; Cl; Br; I or NO<sub>2</sub> and i-X, j-Y=2,3-(CH<sub>3</sub>)<sub>2</sub>; 2,4-(CH<sub>3</sub>)<sub>2</sub>; 2,5-(CH<sub>3</sub>)<sub>2</sub>; 2-CH<sub>3</sub>, 4-Cl; 2-CH<sub>3</sub>, 5-Cl; 3-CH<sub>3</sub>, 4-Cl; 2,4-Cl<sub>2</sub> or 3,4-Cl<sub>2</sub>). *Zeitschrift fur Naturforsch. - Sect. A J. Phys. Sci.* **2002**, 57, 967–973, doi:10.1515/zna-2002-1210.

**Table S4.** Values of water solubility for ILs **1-8** and sodium salt of iodosulfuron-methyl [Na][ISM] at 25 °C.

|                                  | Compound |       |       |       |       |       |       |       | [Na][ISM] |
|----------------------------------|----------|-------|-------|-------|-------|-------|-------|-------|-----------|
|                                  | 1        | 2     | 3     | 4     | 5     | 6     | 7     | 8     |           |
| Solubility [g dm <sup>-3</sup> ] | 53.35    | 2.43  | 3.57  | 0.02  | 0.01  | 0.19  | 0.18  | 0.05  | 28.75     |
| SD <sup>a</sup>                  | 1.420    | 0.078 | 0.022 | 0.003 | 0.001 | 0.020 | 0.012 | 0.004 | 1.490     |

<sup>a</sup> standard deviation



**Table S5.** Values of logarithm of octanol-water partition coefficient for ILs **1-8** and sodium salt of iodosulfuron-methyl **[Na][ISM]** at 25 °C.

| Salt             | Log K <sub>ow</sub> | SD <sup>a</sup> |
|------------------|---------------------|-----------------|
| <b>1</b>         | 0.201               | 0.006           |
| <b>2</b>         | 0.513               | 0.009           |
| <b>3</b>         | 0.514               | 0.007           |
| <b>4</b>         | 0.518               | 0.009           |
| <b>5</b>         | 0.534               | 0.017           |
| <b>6</b>         | 0.452               | 0.050           |
| <b>7</b>         | 0.607               | 0.010           |
| <b>8</b>         | 0.672               | 0.010           |
| <b>[Na][ISM]</b> | -1.260              | 0.022           |

<sup>a</sup> standard deviation

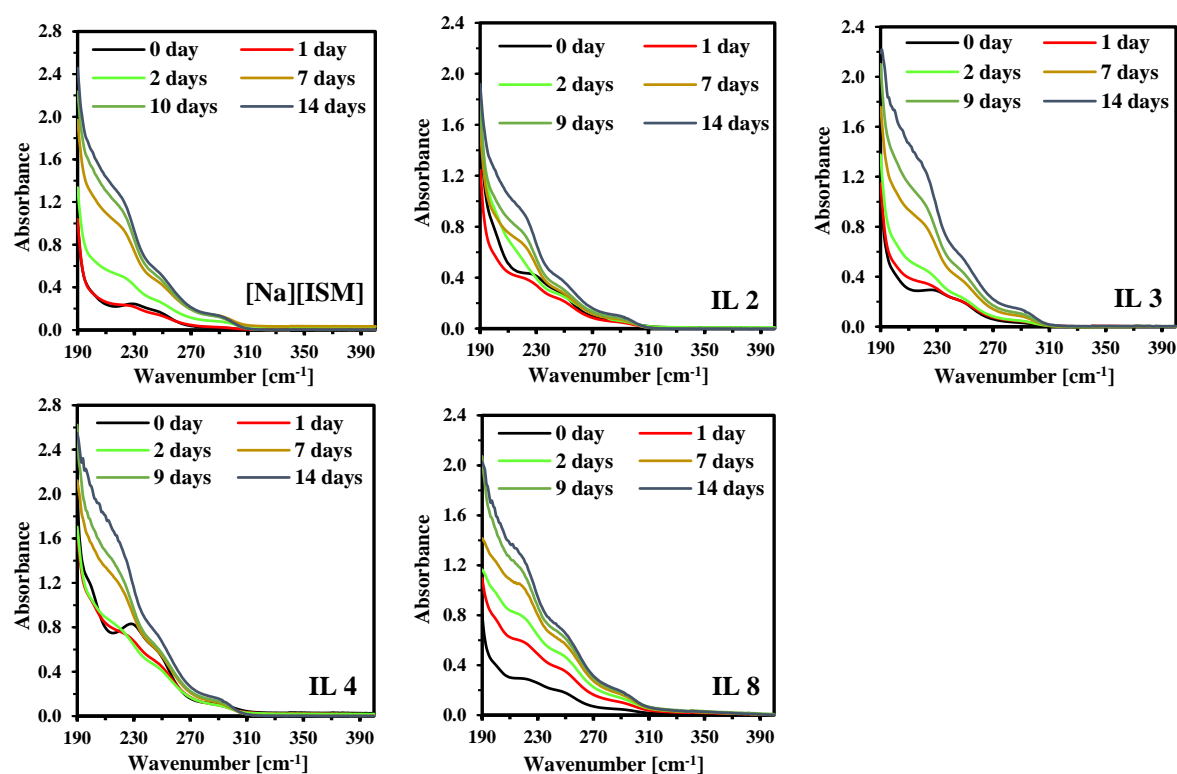

**Figure S36.** UV spectra of iodosulfuron-methyl sodium salt (**[Na][ISM]**) and ILs **2-4** and **8** in acidic environment.

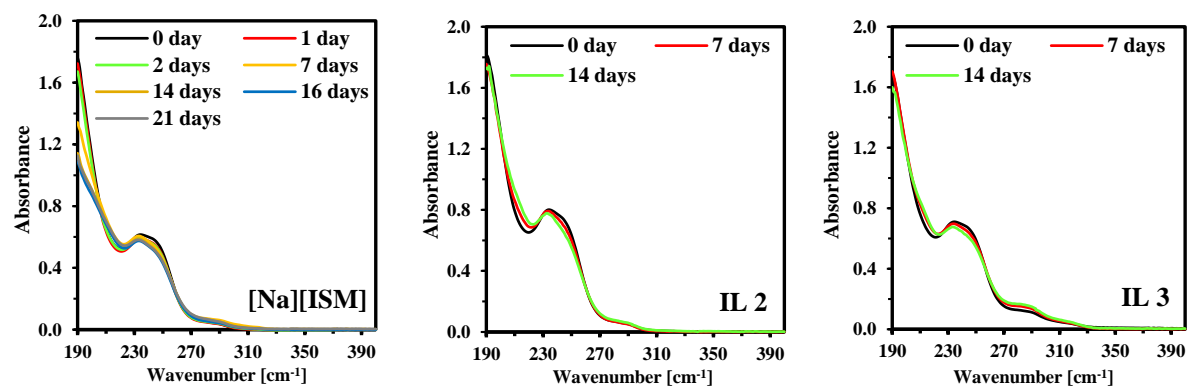

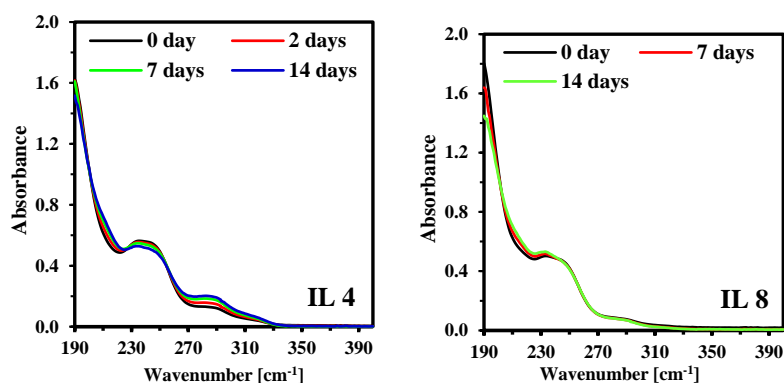

**Figure S37.** UV spectra of iodosulfuron-methyl sodium salt ([Na][ISM]) and ILs **2-4** and **8** in basic environment.

**Table S6.** Volatility of the studied compounds at 35 °C.

| Salt                   | Mass of emitted VOC [%] |
|------------------------|-------------------------|
| <b>1</b>               | 0.02                    |
| <b>2</b>               | 0.00                    |
| <b>3</b>               | 0.02                    |
| <b>4</b>               | 0.00                    |
| <b>5</b>               | 0.06                    |
| <b>6</b>               | 0.03                    |
| <b>7</b>               | 0.92                    |
| <b>8</b>               | 0.02                    |
| <b>REF<sup>a</sup></b> | 0.00                    |

<sup>a</sup> [Na][ISM]

**Table S7.** Efficacy of the prepared ILs (**1-8**) toward cornflower (*Centaurea cyanus* L.) and oil-seed rape (*Brassica napus* L.)

|            | Cornflower                 |         | Oil-seed rape              |         |
|------------|----------------------------|---------|----------------------------|---------|
|            | Fresh weight reduction [%] | SEM [%] | Fresh weight reduction [%] | SEM [%] |
| <b>1</b>   | 24.27 b                    | 7.28    | 27.18 b                    | 11.55   |
| <b>2</b>   | 35.00 b                    | 3.34    | 49.22 a                    | 6.23    |
| <b>3</b>   | 46.24 a                    | 4.36    | 31.16 b                    | 5.03    |
| <b>4</b>   | 38.40 ab                   | 6.99    | 35.83 ab                   | 11.24   |
| <b>5</b>   | 12.88 c                    | 0.43    | 11.71 b                    | 9.57    |
| <b>6</b>   | 16.66 bc                   | 4.77    | 11.76 c                    | 1.69    |
| <b>7</b>   | 28.49 b                    | 3.81    | 31.46 b                    | 1.51    |
| <b>8</b>   | 39.10 ab                   | 2.81    | 36.00 ab                   | 12.55   |
| <b>Ref</b> | 32.93 b                    | 1.23    | 40.24 ab                   | 2.71    |

Ref - HUZAR 05 WG containing sodium salt of iodosulfuron-methyl and adjuvants (heavy aromatic hydrocarbons and unspecified petroleum fraction)

SEM - Standard error of mean

All tested compounds were used in a dose equal to 7.5 g of active ingredient (anion) per hectare

Different letters in columns indicate statistically important differences ( $p < 0.05$ ); a - the highest efficacy of the plant protection product

**Table S8.** Migration of HILs in agricultural soil (soil TLC analysis)

| <b>Salt</b>            | <b>Rf <math>\pm</math> SD</b>      |
|------------------------|------------------------------------|
| <b>1</b>               | 9.8 $\pm$ 0.02                     |
| <b>2</b>               | 9.3 $\pm$ 0.01                     |
| <b>3</b>               | 0.01 - 9.6 $\pm$ 0.01 <sup>b</sup> |
| <b>4</b>               | 0.01 - 9.2 $\pm$ 0.02 <sup>b</sup> |
| <b>5</b>               | 0.01 - 9.4 $\pm$ 0.01 <sup>b</sup> |
| <b>6</b>               | 9.8 $\pm$ 0.01                     |
| <b>7</b>               | 9.6 $\pm$ 0.02                     |
| <b>8</b>               | 9.6 $\pm$ 0.02                     |
| <b>REF<sup>a</sup></b> | 9.6 $\pm$ 0.01                     |

<sup>a</sup> [Na][ISM]; <sup>b</sup> compound was evenly spread along the whole length of the TLC plate
